1 **Genome-wide identification of novel genes involved in *Corynebacteriales* cell envelope biogenesis**  
2 **using *Corynebacterium glutamicum* as a model.**

3 **Short title: Identification of novel genes involved in *Corynebacteriales* cell envelope biogenesis**

4

5 Célia de Sousa-d'Auria<sup>1</sup>, Florence Constantinesco-Becker<sup>1</sup>, Patricia Constant<sup>2</sup>, Maryelle Tropis<sup>2</sup> and  
6 Christine Houssin<sup>1\*</sup>

7

8

9

10 <sup>1</sup>Université Paris-Saclay, CEA, CNRS, Institute for Integrative Biology of the Cell (I2BC), Gif-sur-Yvette,  
11 France.

12 <sup>2</sup>Département Tuberculose & Biologie des Infections, Institut de Pharmacologie et de Biologie  
13 Structurale IPBS, UMR5089, Université de Toulouse, CNRS, UPS, Toulouse, France.

14

15

16

17

18

19

20 \*: corresponding author

21 E-mail: [christine.houssin@i2bc.paris-saclay.fr](mailto:christine.houssin@i2bc.paris-saclay.fr)

## 22 Abstract

23 *Corynebacteriales* are *Actinobacteria* that possess an atypical didermic cell envelope. One of  
24 the principal features of this cell envelope is the presence of a large complex made up of  
25 peptidoglycan, arabinogalactan and mycolic acids. This covalent complex constitutes the  
26 backbone of the cell wall and supports an outer membrane, called mycomembrane in  
27 reference to the mycolic acids that are its major component. The biosynthesis of the cell  
28 envelope of *Corynebacteriales* has been extensively studied, in particular because it is crucial  
29 for the survival of important pathogens such as *Mycobacterium tuberculosis* and is therefore  
30 a key target for anti-tuberculosis drugs. In this study, we explore the biogenesis of the cell  
31 envelope of *Corynebacterium glutamicum*, a non-pathogenic *Corynebacteriales*, which can  
32 tolerate dramatic modifications of its cell envelope as important as the loss of its  
33 mycomembrane. For this purpose, we used a genetic approach based on genome-wide  
34 transposon mutagenesis. We developed a highly effective immunological test based on the  
35 use of anti-arabinogalactan antibodies that allowed us to rapidly identify bacteria exhibiting  
36 an altered cell envelope. A very large number (10,073) of insertional mutants were screened  
37 by means of this test, and 80 were finally selected, representing 55 different loci.  
38 Bioinformatics analyses of these loci showed that approximately 60% corresponded to genes  
39 already characterized, 63% of which are known to be directly involved in cell wall processes,  
40 and more specifically in the biosynthesis of the mycoloyl-arabinogalactan-peptidoglycan  
41 complex. We identified 22 new loci potentially involved in cell envelope biogenesis, 76% of  
42 which encode putative cell envelope proteins. A mutant of particular interest was further  
43 characterized and revealed a new player in mycolic acid metabolism. Because a large  
44 proportion of the genes identified by our study is conserved in *Corynebacteriales*, the library

45 described here provides a new resource of genes whose characterization could lead to a better  
46 understanding of the biosynthesis of the envelope components of these bacteria.

47

## 48 **Introduction**

49 The *Corynebacteriales* order is a group of Gram-positive bacteria widely distributed in nature  
50 that includes corynebacteria, mycobacteria, nocardia, rhodococci and other related  
51 microorganisms [1]. Some of these bacteria are human pathogens, known to cause severe  
52 infectious diseases (*Mycobacterium tuberculosis* or *Mycobacterium leprae*) or opportunistic  
53 pathologies (*Mycobacterium abscessus*, *Corynebacterium jeikeium* or some species of  
54 *Nocardia*). All these bacteria have in common a cell envelope of unusual composition and  
55 architecture [2,3]. Their cell wall core is made up of a peptidoglycan (PG) covalently bound to  
56 arabinogalactan (AG) chains, which in turn are linked to mycolic acids (forming the mycoloyl-  
57 arabinogalactan-peptidoglycan or mAGP complex). Mycolic acids (MA) are  $\alpha$ -branched,  $\beta$ -  
58 hydroxylated fatty acids, exclusively synthesized by *Corynebacteriales*, whose length can reach  
59 up to 100 carbon atoms in mycobacteria [4]. The mycolic acid-containing part of the mAGP  
60 complex associates with other mycolates containing compounds, essentially trehalose mono  
61 or di-mycolates (TMM and TDM respectively), to form the backbone of an outer bilayer named  
62 the mycomembrane [5,6]. This outer membrane, that contains porin-like proteins, is thought  
63 to be the functional equivalent of the outer membrane of gram-negative bacteria, although it  
64 is more impermeable to most compounds and especially antibiotics [7].

65 Biosynthesis of compounds specific to the cell wall of *Corynebacteriales*, i.e. MA and AG, has  
66 been the subject of numerous studies over several decades primarily because the production

67 of these compounds is essential for mycobacterial survival. Hence, AG and MA biosynthesis is  
68 the target of several known antituberculous drugs, *e.g.* ethambutol, isoniazid and  
69 ethionamide, as well as several candidate drugs in pre-clinical or clinical development [8]. In  
70 comparison, *Corynebacterium glutamicum*, a non-pathogenic bacterium widely used in  
71 industrial glutamate production, is much more robust against major disruptions of its cell  
72 envelope. For example, *C. glutamicum* can grow in the complete absence of MA [9] or with an  
73 AG devoid of the arabinose domain [10]. This peculiarity has made this species an  
74 indispensable model for the study of the biosynthesis of the *Corynebacteriales* cell envelope.  
75 Notwithstanding differences in the fine structure of AM and AG within the *Corynebacteriales*,  
76 the major steps of their biosynthesis seem to be conserved among the different genera as  
77 evidenced by the presence, in their genome, of genes encoding the enzymes involved in these  
78 pathways [11]. Although the cytoplasmic part of these biosynthetic pathways is well  
79 understood, a number of unknown factors remain to be discovered regarding the distribution,  
80 transit and assembling of these compounds within the cell envelope. Random mutagenesis,  
81 using transposons, is a popular approach for identifying such factors. In *Corynebacterium*, only  
82 two studies, based on the screening of a transposon-insertion library for mutants with an  
83 altered envelope phenotype, have been published [12,13]. In the first, to identify genes  
84 involved in MA synthesis, Wang et al. [12] analyzed approximately 400 insertional mutants of  
85 *Corynebacterium matruchotii* using their corynomycolic acid content as a screen. They found  
86 one mutant of particular interest with a transposon insertion in a gene encoding a membrane  
87 protein conserved in the *Corynebacteriales* (Cg1766 in *C. glutamicum*). However, a  
88 subsequent characterization of this protein showed that it is actually an  $\alpha(1,6)$   
89 mannopyranosyl-transferase (termed MptB) involved in the synthesis of cell envelope  
90 lipoglycans [14]. In a very recent study, Lim et al. [13] generated the first high-density library

91 of transposon insertion mutants of *C. glutamicum* and screened their library for an  
92 hypersensitivity to the AG synthesis inhibitor ethambutol. Among the 49 loci identified by their  
93 screen (named *ste* for sensitive-to-ethambutol), they found genes encoding proteins already  
94 known to be involved in envelope biogenesis but also identified a new locus implicated in  
95 cytokinesis.

96 Because the function of the mycomembrane is to serve as a selective permeability barrier, any  
97 defect in the synthesis or assembly of any of the outer membrane components will affect its  
98 structure and, consequently, will alter its permeability. Such a relationship between  
99 mycomembrane permeability and alteration in MA synthesis has already been shown in *C.*  
100 *glutamicum* using a MytA-deficient mutant [15]. Indeed, disruption of *mytA*, one of the six  
101 genes encoding mycoloyltransferases present in the *C. glutamicum* genome [16], produces a  
102 significant decrease in cell wall bound corynomycolate and TDM contents, together with an  
103 increase in TMM. In this context, Puech et al. [15] showed that the diffusion rate of two  
104 hydrophilic molecules was significantly greater in the mutant compared to the parental strain,  
105 strongly suggesting an increase in cell wall permeability. We took advantage of this  
106 observation to develop a screen that allowed us to readily identify mutants with an altered  
107 cell envelope permeability. However, rather than using the passive diffusion of a small  
108 molecule through the cell wall to the cytoplasm, as is frequently done in this kind of screen,  
109 we searched for the possibility that increased mycomembrane permeabilization could lead to  
110 excretion of easily monitored cell wall compounds. For this purpose, we used antibodies  
111 directed against AG to screen a transposon mutant library of *C. glutamicum* and identified  
112 new genes involved in cell envelope biogenesis, one of which is very likely involved in the  
113 biosynthesis of mycolic acids.

114

## 115 **Materials and Methods**

### 116 **Bacterial strains and growth conditions**

117 The bacterial strains used in this study are shown in Table 1. *Corynebacterium* strains were  
118 grown in brain heart infusion (BHI) liquid medium with shaking (250 rpm) or in BHI-agar at  
119 30°C. *Escherichia coli* DH5 $\alpha$  was grown at 37°C in Luria-Bertani (LB) medium. When necessary,  
120 appropriate antibiotics were supplemented as follows: chloramphenicol (Cm) 15  $\mu$ g/ml;  
121 kanamycin (Km) 25  $\mu$ g/ml; ampicillin (Amp) 100  $\mu$ g/ml. Electro-transformable *C. glutamicum*  
122 cells were obtained as described in Bonamy et al. [17], with cells collected in early exponential  
123 phase (OD<sub>600</sub> = 1.5) and in the presence of Tween 80 (0.1% v/v final concentration) for strain  
124 2262. Electro-transformable cells were resuspended in 1/500 of the initial culture volume and  
125 100  $\mu$ l of the cells were pulsed in the presence of 20 to 100 ng of DNA for replicative plasmids,  
126 or 500 ng to 3  $\mu$ g for integrative plasmids (MicroPulser<sup>TM</sup> electroporator Biorad in 2 mm  
127 cuvettes (Eurogentec) at 25  $\mu$ F, 2.5 kV and 200  $\Omega$ ). The cell suspension was immediately  
128 diluted with 1 ml of BHI medium and incubated for 1h (replicative plasmids) or 2 hours  
129 (integrative plasmids) at 30°C before plating.

130

131 **Table 1: Bacterial strains and plasmids used in this study**

| Strain or plasmid     | Relevant genotype and/or phenotype | Source or Reference |
|-----------------------|------------------------------------|---------------------|
| <i>E coli</i> strains |                                    |                     |

|                                        |                                                                                                                                                                                                                                     |            |
|----------------------------------------|-------------------------------------------------------------------------------------------------------------------------------------------------------------------------------------------------------------------------------------|------------|
| <i>DH5α</i>                            | F <sup>-</sup> $\phi$ 80 <i>lacZ</i> ΔM15 Δ( <i>lacZYA-argF</i> )U169 <i>recA1</i><br><i>endA1 hsdR17</i> (r <sub>K</sub> <sup>-</sup> ,m <sub>K</sub> <sup>+</sup> ) <i>phoA supE44 λ<sup>-</sup> thi-1</i><br><i>gyrA96 relA1</i> | Invitrogen |
| <i>TOP10</i>                           | F <sup>-</sup> <i>mcrA</i> Δ( <i>mrr-hsdRMS-mcrBC</i> ) $\phi$ 80 <i>lacZ</i> ΔM15<br>Δ <i>lacX74 recA1 araD139 Δ(ara-leu)7697 galU</i><br><i>galk rpsL</i> (Str <sup>R</sup> ) <i>endA1 nupG λ<sup>-</sup></i>                     | Invitrogen |
| <b><i>C. glutamicum</i> strains</b>    |                                                                                                                                                                                                                                     |            |
| 2262                                   | An industrial strain of <i>C. glutamicum</i>                                                                                                                                                                                        | [18]       |
| RES167                                 | Restrictionless derivative of ATCC13032                                                                                                                                                                                             | [19]       |
| CGL2005                                | Restrictionless derivative of ATCC21086,<br>Rifampicin resistant                                                                                                                                                                    | [20]       |
| CGL2022                                | <i>mytA</i> disrupted, Km <sup>R</sup> , derivative of CGL2005                                                                                                                                                                      | [15]       |
| CGL2029                                | Δ <i>mytA</i> -Δ <i>mytB</i> :: <i>Km</i> double mutant, Km <sup>R</sup> ,<br>derivative of CGL2005 strain                                                                                                                          | [21]       |
| Δ <i>cg-pks</i>                        | Δ <i>cg-pks</i> :: <i>Km</i> , Km <sup>R</sup> , derivative of RES167                                                                                                                                                               | [9]        |
| Δ <i>accD3</i>                         | Δ <i>accD3</i> :: <i>Km</i> , Km <sup>R</sup> , derivative of RES167<br>(originally the gene was named <i>accD4</i> )                                                                                                               | [22]       |
| Δ <i>cg1246</i>                        | Δ <i>cg1246</i> derivative of RES167                                                                                                                                                                                                | This work  |
| Δ <i>cg1247</i>                        | Δ <i>cg1247</i> derivative of RES167                                                                                                                                                                                                | This work  |
| <b>Plasmids</b>                        |                                                                                                                                                                                                                                     |            |
| pCR <sup>®</sup> 2.1-TOPO <sup>®</sup> | <i>E. coli</i> cloning vector with <i>f1</i> and pUC origins,<br><i>lacZα</i> , Km <sup>R</sup> , Amp <sup>R</sup>                                                                                                                  | Invitrogen |

|                               |                                                                                                                                             |           |
|-------------------------------|---------------------------------------------------------------------------------------------------------------------------------------------|-----------|
| pCGL0040                      | pBluescript II SK(+) containing the <i>cat</i> gene of Tn9 and the Tn5531 transposon                                                        | [23]      |
| pK18MobSac                    | Km <sup>r</sup> <i>sacB</i> RP4 <i>oriT</i> ColE1 <i>ori</i>                                                                                | [24]      |
| pK18MobSac-<br><i>Δcg1246</i> | pK18MobSac containing the upstream and downstream regions of the <i>cg1246</i> ORF, construct for <i>cg1246</i> deletion                    | This work |
| pCGL482                       | Shuttle vector <i>E coli/C. glutamicum</i> , Cm <sup>R</sup>                                                                                | [25]      |
| pCGL2420                      | Derivative of pCGL482 containing the <i>cg1246</i> gene under its own promoter (304 bp upstream the ATG of <i>cg1247</i> ), Cm <sup>R</sup> | This work |

132

## 133 DNA manipulations

134 Plasmid DNA was extracted from *E. coli* using a Wizard<sup>®</sup> Plus SV Minipreps DNA Purification  
135 System (Promega). *C. glutamicum* chromosomal DNA was extracted as described by Ausubel  
136 et al. [26]. Oligonucleotide primers were synthesized by Eurogentec. PCR experiments were  
137 performed with a 2720 thermocycler (Applied Biosystems) using GoTaq<sup>®</sup> (Promega) or  
138 Phusion<sup>™</sup> High Fidelity (Thermo scientific) DNA polymerases. All DNA purifications were  
139 performed using a Roche High Pure PCR product purification kit or a QIAquick Gel Extraction  
140 Kit (Qiagen). Standard procedures for DNA digestion and ligation were used in conditions  
141 recommended by the enzyme manufacturer (Promega or Fermentas). All DNA sequencing  
142 was carried out by Beckman Coulter or Eurofins Genomics.

143



## 144 **AG preparation and antiserum production**

145 AG was purified according to [27]. Antiserum against AG was produced in rabbits by Covalab.

146

## 147 **Mutant generation and immunological screening**

148 Plasmid pCGL0040 (a non-replicative delivery vector containing Tn5531 [23]) was used to  
149 transform fresh electrocompetent *Corynebacterium* 2262 cells [17] and Km resistant  
150 transformants were selected on BHI-agar plates supplemented with Km. Subsequently, 10,073  
151 mutants were picked from the original plates and transferred both on BHI-Km-agar plates (12  
152 x 12 cm x 14 mm) entirely covered with a nitrocellulose sheet (Protran® BA-85, Schleicher and  
153 Schuell) and to 96-well microtiter plates containing BHI-Km. To grow bacteria, microtiter  
154 plates were incubated at 30°C with shaking overnight before sterile glycerol was added (26.5%  
155 v/v final concentration). Plates were stored at - 80°C until further use. BHI-Km-agar plates  
156 covered with nitrocellulose membranes were also placed at 30°C. Generally, the nitrocellulose  
157 sheet was recovered after 16 hours of culture. Nevertheless, when slow-growing colonies  
158 were detected, the corresponding mutants were transferred on a new nitrocellulose/BHI plate  
159 and allowed to grow for a longer period (24 to 30 h). In order to obtain a replicate of the agar  
160 plate, immediately after removal of the nitrocellulose membrane on which the colonies have  
161 grown, a new membrane was placed on the plate by gently pressing it to allow a total contact  
162 with the agar. After 1 hour of contact at room temperature, the membrane was recovered. All  
163 nitrocellulose membranes were treated in the same way. They were washed 3 times for 5 min  
164 with phosphate-buffered saline containing 0.05 % (v/v) Tween 20 (PBST), in particular, to  
165 completely remove bacteria from the surface of the culture membranes. Membranes were

166 then incubated overnight in blocking buffer (PBST, 5% skim milk powder at 4°C), followed by  
167 3 washes in PBST and a 2 h incubation with primary antibodies against AG (rabbit serum  
168 diluted 1:2,000 in PBST). Membranes were then washed 3 times for 5 min in PBST and  
169 incubated 1 h with alkaline phosphatase-conjugated secondary antibody (Anti-Rabbit IgG (Fc),  
170 AP Conjugate antibody, Promega, 1:7,000 in PBST). After 2 subsequent 5 min washes in PBST,  
171 membranes were incubated in a 0.165 mg/ml BCIP (5-bromo-4-chloro-3-indolyl phosphate,  
172 Promega)/ 0.33 mg/ml NBT (p-nitroblue tetrazolium chloride, Promega) containing solution  
173 (100 mM Tris pH 9.5, 100 mM NaCl, 5 mM MgCl<sub>2</sub>). The reaction development (the appearance  
174 of a halo around the colony mark on a culture membrane or of a signal on the corresponding  
175 replicate membrane, see above) was followed by comparison to the signal produced by  
176 control colonies present on the same culture membrane (the WT strain *C. glutamicum* 2262  
177 and mutants Cg-Pks<sup>-</sup> and MytA<sup>-</sup> derived from RES167 and CGL2005, respectively, or from *C.*  
178 *glutamicum* 2262 *i.e.* mutants 1928 and 308). The reaction was stopped by rinsing membranes  
179 in deionized water.

180 At the end of this first screening round, the positive mutants (350) were selected and  
181 subjected to the same analysis a second time.

182

## 183 **Identification of disrupted genes containing transposon insertions**

184 Identification of the flanking regions adjacent to the transposon insertions was carried out by  
185 inverse PCR [28] or arbitrary-primed PCR [29]. Primers used for these PCR reactions are  
186 provided in S1 Table. For inverse PCR, we used the protocol described in Green and Sambrook  
187 [28]. Briefly, chromosomal DNAs extracted from the different mutants were digested with

188 either *Sall* or *EcoRI* restriction endonucleases and then self-ligated with T4 ligase. PCR were  
189 performed using primer pairs Isb01/CdsX or Isb04/CdsVIII with the circular DNAs from *EcoRI*  
190 or *Sall* digestions, respectively. Depending on the quantity and purity obtained, PCR products  
191 were either purified on columns or purified from agarose gels and, in most cases, sub-cloned  
192 into plasmid pCR<sup>®</sup>2.1-TOPO<sup>®</sup> using the TOPO TA cloning kit (Invitrogen) prior to sequencing.  
193 PCR products were sequenced using primers Isb04 or Isb01 or Rev and F-20. For arbitrary-  
194 primed PCR, the first PCR round was performed with approximately 100 ng of genomic DNA  
195 as template, using the Phusion High Fidelity DNA polymerase. We used a primer specific for  
196 the transposon (Isb01) and a first arbitrary primer that we designed after a search for  
197 pentameric sequences present at least 6,000 times in the genome of ATCC13032 strain but  
198 absent from the transposon (ARB4020). PCR was performed as follows, with primers at a final  
199 concentration of 0.5  $\mu$ M : 5 min 98°C, 6 cycles (10 s 98°C, 30 s 30°C, 1 min 30 s 72°C), 30 cycles  
200 (30 s 98°C, 30 s 45°C, 2 min 72°C) and finally 72°C for 4 min. The PCR products obtained from  
201 this first PCR were purified, and one tenth served as template for a second-round reaction.  
202 We used a second arbitrary primer (ARBq) that paired with the 5' end of ARB4020 and a primer  
203 that pairs with the transposon downstream of the Isb01 sequence (Isb012). Second-round PCR  
204 was performed as follows, with primers at a final concentration of 0.2  $\mu$ M: 1 min 98°C, 30  
205 cycles (30 s 98°C, 30 s 55°C, 2 min 72°C) and finally 72°C for 4 min. If only one major band was  
206 visible on an agarose gel after this second-round PCR, the product was purified and  
207 sequenced. However, when several bands of comparable intensity were present on an  
208 agarose gel, the different products were purified from the gel and submitted to a third round  
209 of PCR in conditions identical to that of the second round. PCR products were sequenced using  
210 primer Isb013.

211

## 212 **Bioinformatic analyses**

213 Sequences interrupted by the transposon were aligned using BLASTn online software at the  
214 NCBI (National Center for Biotechnology Information; <http://www.ncbi.nlm.nih.gov>) using  
215 *Corynebacterium* genomes as the search set. Best matches were systematically obtained with  
216 sequences from SCgG1 and SCgG2 genome strains. However as neither of these two genomes  
217 is annotated, transposon insertion locations were established with respect to the sequence of  
218 the ATCC13032 genome (NCBI Reference Sequence: NC\_006958.1).

219 Conserved domains, or functional units within proteins, were searched using the Conserved  
220 Domain Database (CDD, <https://www.ncbi.nlm.nih.gov/Structure/cdd/wrpsb.cgi>) at the NCBI  
221 [30] and the Integrated Microbial Genomes and Microbiomes web resources (IMG/M:  
222 <https://img.jgi.doe.gov/m/>) [31]. Unknown proteins were classified into general categories  
223 using EggNOG (Evolutionary genealogy of genes: Non-supervised Orthologous Groups) [32]  
224 (<http://eggnog5.embl.de>).

225 Analysis of the *C. glutamicum* transcriptome published by Pfeifer-Sancar et al. [33] was used  
226 to predict genes inactivated in operons.

227

## 228 **Construction of plasmids and bacterial strains**

229 The different plasmids used in this study are described in Table 1. In order to delete *cg1246*,  
230 we used the strategy described by Schafer et al. [24]. In brief, two DNA fragments overlapping  
231 the gene at its 5' and 3' extremities were amplified by PCR from *C. glutamicum* total DNA using  
232 appropriate primers (1246-del1/1246-del2 and 1246-del3/1246-del4, see S1 Table) and  
233 cloned in the non-replicative vector pK18mobSac. The resulting plasmids (pK18mobsac $\Delta$ 1246)

234 was sequenced and transferred into *C. glutamicum* RES167 by electroporation. Transformants  
235 in which the construct was integrated into the chromosome by single crossing-over were  
236 selected on BHI plates containing Km. The second crossover event was selected by plating Km<sup>R</sup>  
237 clones on BHI plates containing 10 % sucrose. Km-sensitive and sucrose-resistant colonies  
238 were screened by PCR for the correct deletion of the gene using appropriate primers. After  
239 verification of PCR products by sequencing, one strain carrying the *cg1246* deletion ( $\Delta$ 1246  
240 strain) was selected for further studies.

241 A complementation vector encoding Cg1246 (pCGL2420) was constructed using pCGL482 as  
242 the cloning vector [25]. Two DNA fragments were amplified by PCR from *C. glutamicum*  
243 RES167 chromosomal DNA: the coding sequence of *cg1246* (using the primer pair 1246-  
244 RcaI/1246-XhoI) and the promoter region of the operon *cg1247-cg1246* (304 bp upstream the  
245 ATG of *cg1247*, using the primer pair p1246-RcaI/p1246BglII) (see S1 Table). The amplicons  
246 were ligated together, digested with *RcaI* and *XhoI* and inserted into the *BamHI/XhoI* digested  
247 pCGL482 to obtain plasmid pCGL2420.

248

## 249 **Biochemical analyses of selected mutants**

### 250 **Protein analyses**

251 Cells grown overnight (equivalent of 1 ml bacterial suspension at an OD<sub>650</sub> = 10) were  
252 centrifuged at 16,000 g for 5 min. Then, 800  $\mu$ l of the supernatant, which contained the  
253 secreted proteins, were added to 200  $\mu$ l of 50% TCA and the mixture incubated for 1 h at 4 °C.  
254 The precipitated proteins were collected by centrifugation, the pellet was washed with  
255 acetone and solubilized in 50  $\mu$ l of Laemmli denaturing buffer. The bacterial pellet was

256 incubated in 50  $\mu$ l of 50 mM Tris-HCl pH 6.8, 2% (w/v) SDS at 100 °C for 3 min and centrifuged  
257 at 16,000 g, for 5 min at 4 °C. The supernatant, which contained the cell wall proteins, was  
258 recovered. Proteins were separated by SDS-PAGE and gels were stained with Coomassie  
259 brilliant blue R-250.

## 260 **Lipid analysis**

261 Lipids were extracted from wet cells for 16 h with CH<sub>3</sub>OH/CHCl<sub>3</sub> (2:1 v/v) at room temperature.  
262 The organic phase was evaporated to dryness and lipids were solubilized in CHCl<sub>3</sub> (typically  
263 100  $\mu$ l for lipids extracted from 20 ml of exponentially growing cells or 10 ml of cells in  
264 stationary phase). Lipids were analysed by Thin Layer Chromatography (TLC) on silica gel-  
265 coated plates (G-60, 0.25 mm thickness, Macherey-Nagel) developed with CHCl<sub>3</sub>/CH<sub>3</sub>OH/H<sub>2</sub>O  
266 (65:25:4, v/v/v). Detection of all classes of lipids was performed by immersion of the TLC plates  
267 in 10% H<sub>2</sub>SO<sub>4</sub> in ethanol, followed by heating at 110°C; glycolipids were revealed by spraying  
268 plates with 0.2% anthrone (w/v) in concentrated H<sub>2</sub>SO<sub>4</sub>, followed by heating at 110°C.

269 The various classes of extractable lipids were also analysed by TLC after radiolabelling. Briefly,  
270 1  $\mu$ Ci of [1-<sup>14</sup>C]-palmitate (2.22 GBq mmol<sup>-1</sup>, Perkin Elmer) was added to 10 ml culture medium  
271 of exponentially or stationary phase-grown bacteria and further incubated for 1.5 h at 30°C.  
272 After centrifugation, the cell pellets were extracted twice with CHCl<sub>3</sub>/CH<sub>3</sub>OH (1:2, v/v, then  
273 2:1, v/v) for 2x24 h. The organic solutions were separated from the delipidated cells by  
274 filtration, then pooled and dried. The crude lipid extracts were resuspended in CHCl<sub>3</sub> at 20  
275 mg/mL and 15  $\mu$ L were spotted onto a Silica Gel 60 TLC plate run in CHCl<sub>3</sub>/CH<sub>3</sub>OH/H<sub>2</sub>O  
276 (65:25:4, v/v/v). Labelled lipids were visualized with a Typhoon phosphorImager (Amersham  
277 Biosciences). The relative percentage of radioactivity incorporated in TMM and in TDM was  
278 determined using Image Quant software (GE Healthcare).

## 279 **Results and Discussion**

### 280 **Development of an original screen to detect mutants with envelope** 281 **disruption**

282 To identify new genes involved in *Corynebacterium* cell envelope biogenesis, we developed  
283 an effective and rapid test using polyclonal antibodies directed against AG. For this purpose,  
284 we took advantage of an observation that we made with well-characterized mutants partly or  
285 totally devoid of mycolic acids. Indeed, as shown in Fig 1, these mutants released, to the  
286 external medium, molecules that reacted with anti-AG antiserum. This excretion was clearly  
287 visible as a halo around a colony when bacteria were spotted and grown on a nitrocellulose  
288 membrane on a BHI plate, after immunoblotting with anti-AG antiserum. No signal was visible  
289 when the corresponding pre-immune serum was used instead of the anti-AG antiserum (data  
290 not shown). Moreover, the size of the excretion halo is commensurate with the importance  
291 of the alteration, as can be seen from a comparison of the wild type (WT) strain, the MytA<sup>-</sup>  
292 mutant [16], the double MytA<sup>-</sup>/MytB<sup>-</sup> mutant [21] and the Cg-Pks<sup>-</sup> [9] or AccD3<sup>-</sup> mutants [22]  
293 which produce 100%, 60 %, 40 % or no mycolic acids, respectively. The same pattern was also  
294 obtained with 2 other mutants defective in AG biosynthesis: AftB<sup>-</sup> [34] and DprE2<sup>-</sup> [35] (data  
295 not shown). Although we were unable to identify the exact nature of the excreted  
296 compound(s) reacting with the anti-AG antibodies (probably because of the small amount  
297 present in the external medium), we believe that this information was not essential for mutant  
298 screening and that this assay could thus be a very powerful means to identify new genes  
299 involved in envelope biogenesis.

300

301 **Figure 1: Immunological test for the detection of mutants with an altered cell envelope**  
302 **permeability.** Different *C. glutamicum* strains were spotted and cultivated on a nitrocellulose  
303 membrane placed on a BHI plate as described in Materials and Methods. The membrane was  
304 first treated with primary antibodies against AG and then by a classical western blot procedure  
305 (phosphatase alkaline coupled secondary antibodies and NBT/BCIP revelation). Clone outlines  
306 are colored in dark purple and are visible for all strains. Mutants are surrounded by a very  
307 distinct halo (light purple around the colony), the size of which is proportional to the  
308 importance of the cell envelope perturbation. The strains used in this test (numbered 1 to 6  
309 in the blot) are given in the table. The % MA indicates the proportion of MA in the mutants as  
310 compared to the corresponding parental strain.

311

## 312 **Construction of a transposon library in *C. glutamicum* and large-scale** 313 **immuno-screening of mutants with an altered envelope**

314 A transposon mutant library of *C. glutamicum* was generated using an IS1207-based  
315 transposon, Tn5531, cloned into a non-replicative delivery vector [23]. This system was shown  
316 to be effective for random mutagenesis in *C. glutamicum* 2262, a strain that does not contain  
317 the IS1207 sequence in contrast to the reference strain ATCC13032 ([23] and unpublished  
318 results). We generated 10,073 insertion mutants in this strain that we analysed by means of  
319 our immunological test.

320 The scheme of the library screening is depicted in Fig 2. Because differences in growth kinetics  
321 of mutants and in plate humidity could generate variability in the diffusion rate of the  
322 antigenic molecules from the nitrocellulose to the agar, we tested each mutant for both the



323 presence of a halo around the colony and/or the presence of a positive signal on the plate  
324 footprint (S1 Fig). To ensure reliable immunological responses, two rounds of screening were  
325 performed. In this way, we were able to select 133 mutants that unambiguously excrete into  
326 the medium a compound recognized by anti-AG antiserum. In order to refine these data, we  
327 searched for characteristics that are commonly observed in cell wall mutants and that could  
328 be present in these pre-selected mutants. These mainly concerned (i) growth and phenotype  
329 differences and (ii) differences in cell wall and secreted protein profiles as compared to the  
330 parental strain. For the first parameter, we analysed colony phenotypes on agar plates, the  
331 rate of growth on solid and liquid media, the tendency to aggregate in liquid culture and the  
332 presence of cell shape or division defects visible by optical microscopy. The second parameter  
333 was based on observations previously made that an alteration of cell-wall architecture makes  
334 the strain more sensitive to SDS treatment, leading to the extraction of a greater number of  
335 cell envelope proteins [21]. Cell envelope alteration also often produces a leakage of cell wall  
336 proteins into the culture medium [16]. We then sorted the mutants by assigning them a score  
337 as follows: we rated 1 or 2 the immunological signal produced by a mutant according to the  
338 size of its diffusion halo (see S1 Fig). We assigned 1 point to each mutant exhibiting at least  
339 one of the phenotypic or growth differences listed above and 1 point to each mutant with  
340 significant differences in cell wall/secreted protein profiles (see S2 Fig for examples). After  
341 summing these three scores, only mutants with a total score  $\geq 2$  were retained, reducing their  
342 number from 133 to 80 (i.e. 0.8% of all the 10,073 mutants analysed by our immunological  
343 screening). Details of the scores attributed to each of the mutants finally selected are provided  
344 in S2 Table.

345

346 **Figure 2: Flow chart of the screening procedure used in this study.** See Materials and  
347 Methods for details.

348

## 349 **Analyses of Tn insertions**

350 The precise insertion site of the transposon in the genome of each of these 80 mutants was  
351 then determined by PCR analyses (inverse or arbitrary PCR) and DNA sequencing. Because the  
352 sequence of the *C. glutamicum* 2262 strain is not available, a nucleotide BLAST analysis was  
353 performed for each of the amplicons against all *C. glutamicum* genomes available in the  
354 National Center for Biotechnology Information (NCBI) database. In all cases, similar DNA  
355 sequences were found with the highest identity scores systematically obtained for strains  
356 SCgG1 (NC\_021351.1) and SCgG2 (NC\_021352.1), two industrial glutamate hyper-producing  
357 strains. As shown in Fig 3A, the selected mutations were distributed all along the chromosome,  
358 but with a number of loci hit several times and a substantial number of insertions in a region  
359 known to be involved in envelope biosynthesis (Fig 3A and 3B, see below). Of the 80 sequences  
360 interrupted by the transposon, 79 could also be unambiguously mapped on the ATCC13032  
361 strain chromosome sequence. The only sequence that could not be mapped was identified at  
362 the upstream region of the *mytC* gene orthologue in SCgG1 and SCgG2. Because the  
363 ATCC13032 strain is the most documented of the *C. glutamicum* strains, we chose to refer to  
364 it, and in particular to the NCBI Reference Sequence: NC\_006958.1 [36]. In this context, and  
365 in the absence of genome annotation for *C. glutamicum* 2262, we annotated genes in this  
366 strain by the locus tag identifier and the gene symbol of the orthologous locus found in  
367 ATCC13032 preceded by ort- for the locus tag.

368 In 70 % of the mutants, the transposon insertion was found to occur inside an open reading  
369 frame (ORF). However, in the remaining 30%, transposon insertion site was found in a non-  
370 coding region at the 5'-end of an ORF (between 10 base pairs (bp) and up to 200 bp upstream  
371 of the start codon, depending on the mutants), that we assumed to be the promoter region  
372 (noted pr-), the interruption of which may, more or less dramatically, affect downstream ORF  
373 expression.

374 Of these 80 mutants, only 55 corresponded to different disrupted loci. Indeed, in 15 cases the  
375 same ORF and/or promoter region was found to be disrupted by the insertion in 2 (7 cases), 3  
376 (7 cases) or 5 times (1 case). Nevertheless, in 3 cases, several insertions were in the exact same  
377 position (3 in *pr-fasl*, 2 in *pr-igt* and 2 in *steA*, see S2 Table). We cannot exclude that identical  
378 insertions came from cross-contaminations although this seems unlikely because the different  
379 strains did not originate from the same plates and that, at least for the *fasI* and *steA* mutants,  
380 the transposon (and consequently the *aphIII* gene) was not inserted in the same direction in  
381 all the mutants. The difference in the orientation of the *aphIII* gene at the 5' end of the *fasI*  
382 gene probably lead to different polar effects that could explain the variations observed in the  
383 scores obtained for the three mutants with the same transposon insertion point.

384 It has been shown that only one-third of the approximately 3000 protein-coding genes of the  
385 ATCC13032 strain are transcribed monocistronically while the remaining two-thirds are part  
386 of operons [33]. If we assume that the transcriptional pattern of *C. glutamicum* 2262 is similar  
387 to that of the ATCC13032 strain, then, 35 of the interrupted loci lie within operons, which  
388 represent 64% of the total number of impacted loci, as would be expected if the transposon  
389 was randomly inserted into the genome.

390 All information concerning the mutants obtained in our library (score, transposon insertion  
391 sites, locus tags, prediction of a gene in an operon, characteristic of gene products) are given  
392 in S2 Table.

393

394 **Figure 3: Overview of the mutant analyses.**

395 (A) Location of transposon insertions (indicated by T) corresponding to the 80 selected  
396 mutants, mapping to the genome of *C. glutamicum* SCgG2. The numbers outside the circle  
397 represent the base pairs (from 0 to 3,350,619). The red rectangle corresponds to the large  
398 cluster of genes known to be involved in cell envelope biogenesis, which is detailed in (B). (B)  
399 Schematic representation of the cell wall biosynthetic gene cluster of *C. glutamicum*  
400 ATCC13032. This large cluster includes many genes involved in mycolic acid and AG  
401 biosynthesis. The cluster is given from *cg3156* to *cg3192* (about 45.8 kb) but its limits are not  
402 precisely known. The distances on the chromosome are indicated. Gene orientation is  
403 indicated by arrows; genes that were insertionally-inactivated are in black; the locations of  
404 transposon insertions are indicated by inverted triangles. For better readability, the genes are  
405 numbered from 1 to 32. Details of their annotations (locus tag, protein name and function)  
406 are provided below. 1: *cg3156* (HsecP), 2: *cg3157* (HsecP), 3: *cg3158* (NagA2: putative  $\beta$ -N-  
407 acetylglucosaminidase), 4: *cg3159* (UspA), 5: *cg3160* (HsecP), 6: *cg3161* (AftD,  
408 arabinosyltransferase, AG biosynthesis), 7: *cg3162* (HP), 8: *cg3163* (TmaT, TMCM  
409 mycolylacetyltransferase), 9: *cg3164* (HMP), 10: *cg3165* (HMP), 11: *cg3166* (HP, putative  
410 glycosyltransferase), 12: *cg3167* (HP), 13: *cg3168* (MtrP, methyltransferase), 14: *cg3169*  
411 (PhosphoenolPyruvate Carboxykinase), 15: *cg3170* (Tellurite resistance protein or related  
412 permease), 16: *cg3172* (tRNA (guanine-N(7)-)-methyltransferase), 17: *cg3173* (HP), 18: *cg3174*

413 (CmpL1 mycolic acid transporter), 19: *cg3175* (HMP), 20: *cg3176* (HP), 20: *cg3177* (AccD3,  
414 subunit of Acyl-CoA carboxylase complex, mycolic acid biosynthesis), 21: *cg3178* (Cg-Pks,  
415 mycolic acid condensase), 22: *cg3179* (Cg-FadD2, fatty acyl-AMP ligase, mycolic acid  
416 biosynthesis), 23: *cg3180* (Elrf, envelope lipid composition regulator), 24: *cg3181* (HSecP), 25:  
417 *cg3182* (MytA, mycoloyltransferase), 26: *cg3185* (Pcons, HP), 27: *cg3186* (MytB,  
418 mycoloyltransferase), 28: *cg3187* (AftB, AG biosynthesis), 29: *cg3189* (UbiA,  
419 decaprenylphosphoryl-D-arabinose (DPA) biosynthesis), 30: *cg3190* (5'-phosphoribosyl-  
420 monophospho-decaprenol phosphatase, DPA biosynthesis), 31: *cg3191* (GIFT2,  
421 galactosyltransferase, AG biosynthesis), 32: *cg3192* (HMP). (C) Pie chart representing the  
422 distribution, by functional categories, of the proteins of known function identified by our  
423 screening procedure. The part of the circle outlined in black represents the categories that are  
424 directly related to the biogenesis of the cell envelope. Numbers in parenthesis represent the  
425 number of genes in the corresponding category. (D) Pie chart representing the distribution, by  
426 putative localizations, of the proteins of unknown or poorly characterized functions identified  
427 by our screen. Numbers in parenthesis represent the number of genes in the corresponding  
428 category.

429

## 430 **Immuno-screening with anti-AG antibodies is effective to identify** 431 **genes involved in cell wall biogenesis of *Corynebacteriales***

432 Bioinformatic analyses of DNA sequences interrupted by the transposon showed that 34 loci  
433 (51 different mutants) correspond to ORFs or promoter regions of previously characterized  
434 genes (Fig 3C). These loci are shown in Table 2. Among them, 20 are directly involved in cell

435 wall processes. Two genes encode proteins that synthesize essential molecules for cell  
436 envelope building: (i) fatty acids, the precursors of phospholipids and mycolic acids (5 hits)  
437 and (ii) decaprenyl-pyrophosphate, the lipid carrier of many precursors of cell wall compounds  
438 (insertion in the promoter region of *uppS1*). Thirteen interrupted loci were found to be directly  
439 involved in mAGP complex biosynthesis: *cg-pks*, *pr-pptT*, *cmrA*, *pr-dtsR2*, *mytA*, *mtrP* (mycolic  
440 acid biosynthesis), *aftB*, *aftD*, *pr-glfT2* (AG biosynthesis), *ponA*, *ftsI*, *alr*, *ltsA* (PG biosynthesis).  
441 Three transposon insertions affected genes involved in cell division (*fhaA*, *ftsK* and *mraW*  
442 which, with *ftsI*, belongs to the *dcw* cluster). Two loci encoding enzymes that modify envelope  
443 proteins post-translationally were also interrupted: *lgt*, and *pr-mytC*, responsible for the  
444 transfer of a diacylglyceride or a mycolate onto proteins, respectively. Twelve of the 14 other  
445 genes are mainly related to metabolic functions and energy production, most of which may  
446 have an indirect influence on the biosynthesis of envelope compounds. This is most probably  
447 the case for genes encoding enzymes of central metabolism (*lpd*, *mgo*, *deoC* and *zwf*) or  
448 encoding proteins involved in the assembly of the cytochrome *bc1-aa3* supercomplex (*ctiP*  
449 and *pr-ctaD* and *surf1*), the inactivation or under-expression of which will certainly modify  
450 respiratory chain activity and consequently carbon fluxes. Two genes (*otsA* and *otsB*),  
451 belonging to one of the three different trehalose synthesis pathways present in *C.*  
452 *glutamicum*, were also interrupted by the transposon. Because trehalose is the main acceptor  
453 of mycolates in the cell envelope [37], it is not very surprising to obtain such mutants by our  
454 screening. We found 3 independent insertions in *pdxR*, a gene encoding a positive  
455 transcriptional regulator of the pyridoxal 5'-phosphate synthase genes. Many enzymes use  
456 pyridoxal 5'-phosphate (PLP) as a cofactor, primarily thus involved in the biosynthesis of amino  
457 acids and their derivatives. For example, *meso*-diaminopimelate (*m*-DAP), an essential amino-  
458 acid in PG, is synthesized by two pathways, one of which (the succinyl pathway) uses DapC

459 (the succinyl-diaminopimelate transaminase), a PLP-dependent enzyme, and it has been  
460 shown that mutations in this pathway led to loss of cell wall integrity [38]. We also found an  
461 insertion in *bioM*, which is part of the *bioYMN* operon encoding the biotin transport system.  
462 *C. glutamicum* is a biotin auxotrophic bacterium, and must import the cofactor from its  
463 environment by the ATP-dependent BioYMN transport system [39]. Biotin is essential for acyl-  
464 CoA carboxylases involved in fatty acid and mycolate biosynthesis and it has been shown that  
465 biotin limitation can lead to a small decrease in mycolic acid content but also to an important  
466 change in their chain length [40].

467 These results unambiguously showed that our immunological screen is a powerful tool for the  
468 identification of proteins involved in cell wall compound biosynthesis and, more widely, in cell  
469 wall biogenesis (Fig 3C).

470

471 **Table 2: Genes interrupted by the transposon which encode characterized functions**

| Gene/locus                                                | Nb | Protein and function                                                                      | Ref  |
|-----------------------------------------------------------|----|-------------------------------------------------------------------------------------------|------|
| <b>Lipid and isoprenoid biosynthesis</b>                  |    |                                                                                           |      |
| <i>pr-fasl</i> and <i>fasl</i> (ort-<br><i>cg2743</i> )   | 5  | FasI-A: Fatty Acid Synthase                                                               | [41] |
| <i>pr-uppS1</i> (ort-<br><i>cg1130</i> )                  | 1  | UppS1: catalyzes the synthesis of the lipid carrier<br>decaprenyl pyrophosphate           | [42] |
| <b>Mycolic acid biosynthesis</b>                          |    |                                                                                           |      |
| <i>pr-dtsR2</i> and <i>dtsR2</i><br>(ort- <i>cg0811</i> ) | 3  | DtsR2/AccD2: $\beta$ subunit of the acetyl-CoA carboxylase<br>involved in MA biosynthesis | [43] |

|                                                               |   |                                                                                                               |             |
|---------------------------------------------------------------|---|---------------------------------------------------------------------------------------------------------------|-------------|
| <i>pptT</i> (ort-cg2171)                                      | 1 | PptT: 4'-phosphopantetheinyl transferase that activates the mycolic acid condensing enzyme Cg-Pks             | [44]        |
| <i>mtrP</i> (ort-cg3168)                                      | 1 | MtrP: a methyltransferase required for optimal transport of TMM, precise function unknown.                    | [45]        |
| <i>pr-cg-pks and cg-pks</i><br>(ort-cg3178)                   | 2 | Cg-Pks: fatty acid condensase that synthesizes MA                                                             | [9]         |
| <i>cmrA</i> (ort-cg2717)                                      | 1 | CmrA: MA reductase.                                                                                           | [46]        |
| <i>mytA/cop1</i><br>(ort-cg3182)                              | 2 | MytA: mycoloyltransferase A, catalyzes the transfer of a MA onto TMM (to give TDM) and AG                     | [15,<br>16] |
| <b>Arabinogalactan biosynthesis</b>                           |   |                                                                                                               |             |
| <i>aftD</i> (ort-cg3161)                                      | 2 | AftD: arabinosyltransferase D involved in the biosynthesis of the arabinan domain of AG                       | [47]        |
| <i>aftB</i> (ort-cg3187)                                      | 1 | AftB: arabinosyltransferase B involved in the biosynthesis of the arabinan domain of AG                       | [48]        |
| <i>pr-glfT2</i> (ort-cg3191)*                                 | 1 | GlfT2: galactosyltransferase that transfers Galf to the arabinan domain of AG                                 | [49]        |
| <b>Peptidoglycan biosynthesis and cell division processes</b> |   |                                                                                                               |             |
| <i>fhaA</i> (ort-cg0064)                                      | 1 | FhaA: cell-division associated protein. <i>fhaA</i> is the first gene of an operon involved in cell division. | [50]        |
| <i>ponA</i> (ort-cg0336)                                      | 1 | PonA/Pbp1a: Penicillin-Binding Protein 1A                                                                     | [51]        |
| <i>alr</i> (ort-cg0681)                                       | 1 | Alanine racemase: converts L-alanine to D-alanine used in PG biosynthesis                                     | [52]        |



|                                                              |   |                                                                                                                                                                                             |      |
|--------------------------------------------------------------|---|---------------------------------------------------------------------------------------------------------------------------------------------------------------------------------------------|------|
| <i>ltsA</i> (ort-cg2410)                                     | 1 | LtsA: glutamine amidotransferase that catalyzes the amidation of cell wall PG diaminopimelic acid (DAP) residues                                                                            | [53] |
| <i>pr-ftsK</i> (ort-cg2158)                                  | 2 | FtsK: putative cell division protein involved in chromosome partitioning                                                                                                                    | [50] |
| <i>pr-ftsI</i> (ort-cg2375)                                  | 1 | FtsI: Penicillin-Binding Protein. <i>ftsI</i> is the first gene of an operon which is part of the <i>dcw</i> cluster                                                                        | [54] |
| <i>mraW</i> (ort-cg2377)                                     | 1 | MraW: putative S-adenosylmethionine-dependent 16SRNA methyltransferase. The <i>mraw</i> gene is part of the <i>dcw</i> cluster (orthologous to MraW of <i>E. coli</i> )                     | [55] |
| <b>Post-translational modifications of envelope proteins</b> |   |                                                                                                                                                                                             |      |
| <i>pr-mytC</i> (ort-cg0413)                                  | 1 | MytC: mycoloyltransferase that catalyzes protein mycoloylation                                                                                                                              | [56] |
| <i>pr-lgt</i> and <i>lgt</i> (ort-cg2292)                    | 3 | Lgt: prolipoprotein diacylglyceryl transferase                                                                                                                                              | [57] |
| <b>Metabolism and energy production</b>                      |   |                                                                                                                                                                                             |      |
| <i>lpd</i> (ort-cg0441)                                      | 1 | Lpd: dihydrolipoamide dehydrogenase, a component of the pyruvate dehydrogenase complex and the oxoglutarate dehydrogenase complex (TCA cycle)                                               | [58] |
| <i>deoC</i> (ort-cg0458)                                     | 1 | DeoC: deoxyribose-phosphate aldolase, produces D-glyceraldehyde 3-phosphate and acetaldehyde which enters central metabolism through the glycolytic pathway and the TCA cycle, respectively | [59] |

|                                            |   |                                                                                                                                                        |      |
|--------------------------------------------|---|--------------------------------------------------------------------------------------------------------------------------------------------------------|------|
| <i>proC</i> (ort-cg0490)                   | 1 | ProC: pyrroline-5-carboxylate reductase catalyzes the formation of L-proline from pyrroline-5-carboxylate                                              | [60] |
| <i>Zwf</i> (ort-cg1778)                    | 1 | Zwf: glucose-6-phosphate 1-dehydrogenase (pentose phosphate pathway)                                                                                   | [59] |
| <i>mgo</i> (ort-cg2192)                    | 1 | Mgo: malate:quinone oxidoreductase (TCA cycle)                                                                                                         | [59] |
| <i>surf1</i> (ort-cg2460)                  | 1 | Surf1: involves in the assembly of cytochrome aa3 oxidase probably in relation to the heme <i>a</i> insertion into the CtaD apo-protein (respiration)  | [61] |
| <i>ctiP</i> (ort-cg2699)                   | 1 | CtiP: involves in the biogenesis of cytochrome aa3 oxidase by transporting and transferring copper to the Cu <sub>B</sub> center of CtaD (respiration) | [62] |
| <i>pr-ctaD</i> (ort-cg2780)                | 2 | CtaD: cytochrome aa3 oxidase subunit I (respiration)                                                                                                   | [63] |
| <i>otsA</i> (ort-cg2907)                   | 1 | OtsA: trehalose 6-phosphate synthase (trehalose biosynthesis)                                                                                          | [37] |
| <i>otsB</i> (ort-cg2909)                   | 1 | OtsB: trehalose 6-phosphate phosphatase (trehalose biosynthesis)                                                                                       | [37] |
| <b>Cofactor biosynthesis and transport</b> |   |                                                                                                                                                        |      |
| <i>pdxR</i> (ort-cg0897)                   | 3 | PdxR: transcriptional regulator of genes involved in pyridoxal 5'-phosphate (PLP) synthesis                                                            | [64] |
| <i>bioM</i> (ort-cg2148)                   | 1 | BioM: biotin transport protein (ATPase)                                                                                                                | [39] |
| <b>Others</b>                              |   |                                                                                                                                                        |      |
| <i>pr-ohr</i> (ort-cg0038)                 | 1 | Ohr: Organic Hydroperoxide Resistance protein                                                                                                          | [65] |

|                                                        |   |                                                                                                                                                          |      |
|--------------------------------------------------------|---|----------------------------------------------------------------------------------------------------------------------------------------------------------|------|
| <i>pr-nusG</i> or <i>nusG</i><br>( <i>ort-cg0562</i> ) | 3 | NusG: orthologue of Rv0639, a NusG paralogue which interacts with ribosomal protein S10, and thereby participates in transcription–translation coupling. | [66] |
|--------------------------------------------------------|---|----------------------------------------------------------------------------------------------------------------------------------------------------------|------|

472 Nb: Number of mutants interrupted in the same locus

473 \*: The transposon was inserted in a non-coding region at an equivalent distance from the

474 ATG of the *glfT2* and *cg3192* genes

475

## 476 **Identification of 22 putative new players in cell wall biogenesis of *C.***

### 477 ***glutamicum***

478 Twenty-two loci (corresponding to 30 different mutants) of unknown, or poorly characterized  
479 functions have been identified by our screening method. As shown in Table 3, approximately  
480 60 % of the uncharacterized proteins fall into the category “function unknown” according to  
481 the EggNOG functional classification [32]. Although we have very limited (or no) indications of  
482 their function, as expected from the panel of known genes identified in Table 2, at least one  
483 half of these unknown proteins could be involved in cell wall biogenesis. To support this  
484 hypothesis, an analysis of the translated sequences showed that, while 5 correspond to  
485 hypothetical cytosolic proteins, 13 correspond to hypothetical membrane proteins and 3 to  
486 putative secreted proteins (Table 3 and Fig 3D). Thus, 73% of the unknown proteins found in  
487 this study are predicted to localize in the bacterial cell envelope (inner membrane or cell wall),  
488 a result that reinforces the idea that most of the proteins targeted by our screen are  
489 associated with cell envelope functions. It should be noted that for 2 mutants (5267 and 3464  
490 see S2 Table), we do not know if only one gene was affected by the transposon and, if so,

491 which one. In mutant 5267, the transposon insertion was localized both at the very beginning  
 492 of the coding sequence of *ort-cg1137* but also presumably in the *ort-cg1136* promoter. Both  
 493 genes encode unknown proteins. In mutant 3464, the transposon was inserted in an intergenic  
 494 region at an equal distance from each of the ATG codons of *ort-cg3191* (*glfT2*) and *ort-cg3192*  
 495 (encoding an unknown function). Because of its role in AG biosynthesis, it is tempting to favor  
 496 an impact on *glfT2* (Table 2), but an impact on *ort-cg3192* cannot be excluded.

497

498 **Table 3: Genes interrupted by the transposon that encode poorly characterized or unknown**  
 499 **functions**

| Locus                          | Nb | EggN<br>OG <sup>a</sup> | Localiz<br>ation <sup>b</sup> | Conserved domain/predicted function                                                                                                               |
|--------------------------------|----|-------------------------|-------------------------------|---------------------------------------------------------------------------------------------------------------------------------------------------|
| <i>ort-cg0530</i>              | 1  | S                       | mb                            | DUF4229 (PF14012) domain-containing protein.                                                                                                      |
| <i>ort-cg0575</i>              | 2  | S                       | mb                            | DUF3068 (PF11271) domain-containing protein.                                                                                                      |
| <i>ort-cg0853</i>              | 1  | S                       | cyt                           | DUF3499 (PF12005) domain-containing protein. First gene in an operon involved in the synthesis of Man6P the precursor of the sugar donor GDP-Man. |
| <i>pr-ort-cg0947</i>           | 1  | S                       | cyt                           | DUF3071 (PF11268) domain-containing protein.                                                                                                      |
| <i>ort-cg1137</i> <sup>1</sup> | 1  | K                       | cyt                           | Putative transcriptional regulator of LysR type (cd05466 conserved domain).                                                                       |

|                                                                |   |     |     |                                                                                                                                                                                                                                                                               |
|----------------------------------------------------------------|---|-----|-----|-------------------------------------------------------------------------------------------------------------------------------------------------------------------------------------------------------------------------------------------------------------------------------|
| <i>ort-cg1246</i>                                              | 3 | S   | cyt | DUF402 (PF04167) domain-containing protein. Also classified in COG2306: Predicted RNA-binding protein, associated with RNase of E/G family.                                                                                                                                   |
| <i>ort-cg1254</i>                                              | 1 | S   | mb  | Classified in COG2246 and PF04138: putative flippase GtrA (transmembrane translocase of bactoprenol-linked glucose). Proteins of the GtrA family are predicted to be involved in the biosynthesis of cell surface polysaccharides.                                            |
| <i>ort-cg1270</i>                                              | 1 | E   | cyt | Classified in COG4122 and PF13578: Predicted O-methyltransferase.                                                                                                                                                                                                             |
| <i>ort-cg1603</i><br><i>and</i><br><i>pr-ort-cg1603 (steA)</i> | 3 | S   | mb  | Classified as membrane-anchored protein (COG4825), with a thiamine pyrophosphokinase C terminal domain - TPPK_C (PF12555). Function unknown, but recently identified by Lim et al. [13] as part of a complex involved in cytokinesis and named SteA.                          |
| <i>pr-ort-cg1735</i>                                           | 1 | D/M | env | Putative cell wall-associated hydrolase with a NlpC C-terminal domain (COG0971 and PF00877: NLPC_P60). The 134 last amino-acids are homologous to the C-terminal domain of RipA ( <i>Rv1477</i> ) a PG endopeptidase that cleaves the bond between D-glu and <i>meso</i> -DAP |

|                                      |   |   |    |                                                                                                                                                                                                                                                             |
|--------------------------------------|---|---|----|-------------------------------------------------------------------------------------------------------------------------------------------------------------------------------------------------------------------------------------------------------------|
| <i>ort-cg2157</i><br>( <i>terC</i> ) | 2 | P | mb | Classified in COG0861 and PF03741: integral membrane protein of the TerC family, possibly involved in tellurium resistance                                                                                                                                  |
| <i>ort-cg2207</i><br>( <i>rspE</i> ) | 1 | M | mb | Predicted Zn-dependent protease homologous to the Rip1 metalloprotease which is a determinant of <i>M. tuberculosis</i> cell envelope composition and virulence (COG0750: Membrane-associated protease RseP)                                                |
| <i>ort-cg2397</i>                    | 1 | S | mb | Classified in acyltransferase family (Acyl_transf_3, PF01757) transferring acyl groups other than amino-acyl groups. Also classified in COG4763: uncharacterized membrane protein YcfT.                                                                     |
| <i>ort-cg2424</i>                    | 1 | S | mb | DUF4191 (PF13829) domain-containing protein.                                                                                                                                                                                                                |
| pr- <i>ort-cg2657</i>                | 1 | S | mb | No conserved domain                                                                                                                                                                                                                                         |
| <i>ort-cg2811</i>                    | 3 | V | mb | Classified as putative permease component of an ABC-type transport system, involved in lipoprotein release, (COG4591: LolE domain). 2 MacB_PCD domains (MacB-like periplasmic core domain, PF12704) and 2 FtsX domains (FtsX-like permease family, PF02687) |

|                               |   |       |        |                                                                                                                                                                                                                               |
|-------------------------------|---|-------|--------|-------------------------------------------------------------------------------------------------------------------------------------------------------------------------------------------------------------------------------|
| <i>ort-cg2861</i>             | 1 | S     | mb     | Classified in COG1272 and PF03006: predicted membrane channel-forming protein, Hemolysin III related.                                                                                                                         |
| <i>pr-ort-cg2971</i>          | 1 | E/G/P | mb     | Lincomycin resistance protein LmrB. Predicted arabinose efflux permease, MFS family (COG2814) and major facilitator superfamily (MFS_1, PF07690). Identified by Kim et al. [67] as potentially involved in lincomycin efflux. |
| <i>ort-cg3052</i>             | 1 | S     | env/mb | Putative secreted protein with prokaryotic membrane lipoprotein lipid attachment site profile. No conserved domains.                                                                                                          |
| <i>ort-cg3157</i>             | 1 | V     | env    | Putative secreted protein. Classified in COG2720: vancomycin resistance protein YoaR (function unknown), contains putative peptidoglycan-binding domain (PG_binding_4, PF12229)                                               |
| <i>ort-cg3165</i>             | 1 | S     | mb     | No conserved domain                                                                                                                                                                                                           |
| <i>ort-cg3192<sup>2</sup></i> | 1 | S     | mb     | DUF5129 (PF17173) domain-containing protein.                                                                                                                                                                                  |

500 Nb: Number of mutants interrupted in the same locus

501 <sup>a</sup> Letters refer to the EggNOG (Evolutionary genealogy of genes: Non-supervised Orthologous  
502 Groups) classification of functions [32]. D: cell cycle control, cell division, chromosome  
503 partitioning, E: amino acid transport and metabolism, G: carbohydrate transport and  
504 metabolism, K: transcription M: cell wall/membrane/envelope biogenesis, O: post-  
505 translational modification, protein turnover, and chaperones, P: inorganic ion transport and

506 metabolism, Q: secondary metabolite biosynthesis, transport, and catabolism, S: function  
507 unknown, V: defense mechanisms.

508 <sup>b</sup> Predicted localization from the primary sequence of the putative protein: cytoplasm (cyt),  
509 membrane (mb) and envelope (env).

510 <sup>1</sup> The transposon integration into this locus could also affect the transcription of *cg1136*, as  
511 the insertion is also presumably in the promoter of *cg1136*, a gene encoding a protein of  
512 unknown function and without any conserved domain.

513 <sup>2</sup> The transposon was inserted in a non-coding region at an equivalent distance from the ATG  
514 of the *glfT2* and the *cg3192* genes

515

## 516 **Hypothetical membrane proteins**

517 Among the 13 hypothetical membrane proteins uncovered here, 2 are most likely related to  
518 envelope dynamics. The first one is ort-Cg1603 (whose locus was inserted 3 times by the  
519 transposon) a membrane-anchored protein with a putative cytoplasmic domain and a poorly  
520 conserved thiamine diphosphokinase domain (PF12555) at its C-terminal. In ATCC13032,  
521 *cg1603* is predicted to be transcribed with *cg1604*, which encodes a protein orthologous to  
522 the mycobacterial outer membrane protein MctB, involved in copper efflux [68]. Surprisingly,  
523 *cg1603* and *cg1604* were very recently identified as conferring ethambutol hypersensitivity  
524 and cell separation defects when inactivated [13]. The authors proposed that Cg1603 (named  
525 SteA) and Cg1604 (named SteB) both localized in the inner membrane at the division site  
526 where they form a complex. This complex was hypothesized to connect other division proteins  
527 and in particular a putative periplasmic PG endopeptidase (Cg1735) that we also identified in



528 this study. The second protein is ort-Cg2207, a putative membrane-embedded Zn-dependent  
529 protease of the RseP (Regulator of Sigma E protease) family that may play a role in cell  
530 biogenesis regulation. Indeed, the orthologue in *M. tuberculosis* is the Rip1 protein which  
531 controls 4 extracytoplasmic function (ECF) sigma ( $\sigma$ ) factor pathways (K,L,M and D) [69,70]  
532 and influences the lipid composition of the mycobacterial envelope, including MAs, by  
533 controlling the transcription of many specific genes [71]. It is tempting to hypothesize that  
534 Cg2207 could act on the  $\sigma^D$  pathway that controls the integrity of the cell envelope in *C.*  
535 *glutamicum* [72,73]. However, it is important to note that (i) unlike SigD (the sigma factor),  
536 the anti-sigma factor RsdA is not conserved between *C. glutamicum* and *M. tuberculosis*, (ii)  
537 the  $\sigma^D$  regulons are different between the two genera [72–74] and (iii) there is no  
538 experimental evidence for a proteolytic function of Cg2207 *in vivo*.

539 Four loci hit by the transposon encode potential membrane transporters (ort-Cg1254, ort-  
540 Cg2811, ort-Cg2157 and ort-Cg2971). Cg1254 is annotated as a putative flippase of the GtrA  
541 family (COG2246), a group of proteins predicted to be involved in the biosynthesis or  
542 translocation of precursors of cell surface polysaccharides. Cg2811 (whose gene was inserted  
543 3 times) is annotated as a predicted ABC-type permease transport system member, with  
544 conserved domains that belong to protein families involved in lipoprotein or lipid transport  
545 across the envelope (COG4591). In ATCC13032, *cg2811* is predicted to be transcribed with  
546 *cg2812* that encodes the putative cognate ATPase component of the system. Cg2157 (whose  
547 gene was inserted 2 times) is annotated as TerC (for Tellurite resistance protein, COG0861)  
548 and classified in the general category “inorganic ion transport and metabolism”. It is  
549 interesting to note that *cg2157* is located just downstream of the *ftsK* gene (*cg2158*) encoding  
550 a DNA translocase essential for cell division, that was also a target of the transposon (see Table  
551 2). It appears that, neither the nature of the substrates transported by these three proteins,

552 nor their role in the biosynthesis of the cell envelope can be deduced from these annotations.

553 The fourth putative transporter (*ort-Cg2971*) is annotated as LmrB in ATCC13032 strain and

554 was previously described to be involved in the proton-dependent efflux of the antibiotic

555 lincomycin [67]. It is not currently known if Cg2971 transports other substrates in connection

556 with envelope biosynthesis. Two other hypothetical membrane proteins identified here have

557 sequences that matched with conserved domains or families (*ort-Cg2397* and *ort-Cg2861*).

558 Cg2397 is an uncharacterized membrane protein possessing a predicted acyl transferase

559 domain transferring acyl groups other than amino-acyl groups (PF01757). Interestingly in

560 ATCC13032, *cg2397* is located in the vicinity of genes encoding proteins involved in envelope

561 biogenesis: MptA (*cg2385*), MptD (*cg2390*) MptC (*cg2393*) and PimB' (*cg2400*) (lipoglycan

562 biosynthesis), MytF (*cg2394*) (mycolate biosynthesis), PlsC (*cg2398*) (phospholipid

563 biosynthesis) and Cg2401 a putative secreted PG lytic protein. Cg2861 is a predicted

564 membrane channel-forming protein belonging to the hemolysin III family (COG1272). Finally,

565 5 putative membrane proteins have been identified whose sequences matched with domains

566 of unknown function (DUF) indexed in the PFAM database (*ort-Cg0530*, *ort-Cg0575* (2

567 mutants) and *ort-Cg2424*) or has no conserved domain (*ort-Cg2657* and *ort-Cg3165*). Although

568 lacking any information on their putative function, 2 of these genes were found to be located

569 in clusters involved in the biosynthesis of cell envelope compounds implying that they are

570 relevant in this context. Indeed, *cg0530* is surrounded by genes encoding proteins responsible

571 for the biosynthesis of respiratory chain components (quinone, cytochrome c, heme) and

572 *cg3165* is within a large cluster dedicated to cell envelope biosynthesis. It is interesting to note

573 that, eight genes from this locus were inserted by the transposon (*ort-cg3157*, *aftD* (*ort-*

574 *cg3161*), *mtrP* (*ort-cg3165*), *ort-cg3168*, *cg-pks* (*ort-cg3178*), *mytA* (*ort-cg3182*), *aftB* (*ort-*

575 *cg3187*) and potentially *glfT2* (*ort-cg3191*) and/or *ort-cg3192* (Fig 3B).

576

## 577 **Hypothetical secreted proteins**

578 Two proteins identified in this work possess a putative sec-type signal sequence (ort-Cg1735  
579 and ort-Cg3157) and are likely related to PG metabolism. Indeed, Cg1735 possesses a C-  
580 terminal NlpC/P60 domain generally associated with a cell wall peptidase activity [75].  
581 Although the protein was named RipC by Lim et al. [13], it is not orthologous to the protein of  
582 the same name in *M. tuberculosis*. Nevertheless, in accordance with a putative function in PG  
583 hydrolysis, and despite the absence of enzymatic data, two studies have shown that  
584 inactivation of the protein lead to important defects in cell separation, a result that links the  
585 protein to the division process in *C. glutamicum* [13,76]. Cg3157 possesses both a PG-binding  
586 domain (PF12229) and a VanW domain (COG2720, associated to vancomycin resistance, a PG  
587 modification), which suggests a role of Cg3157 in PG metabolism.

588 One protein possesses a predicted lipoprotein lipid attachment site (ort-Cg3052) but has no  
589 discernable conserved domain.

590

## 591 **Hypothetical soluble non-secreted proteins**

592 Five proteins are predicted to be non-membranous and non-secreted (ort-Cg0853, ort-  
593 Cg0947, ort-Cg1137, ort-Cg1246 and ort-Cg1270). One of them (Cg1246) could be linked to  
594 cell envelope biosynthesis. Indeed, although the putative protein has unknown function, the  
595 corresponding gene (inserted by the transposon 3 times) is part of the  $\sigma^D$  regulon that  
596 regulates mycomembrane biosynthesis and PG structure [72,73]. It is also possible that  
597 Cg0853 is indirectly involved in the construction of the cell envelope. Indeed, in ATCC13032,

598 its gene is surrounded by genes involved in GDP-mannose biosynthesis (*manA*, encoding a  
599 mannose-6-phosphate isomerase and *pmmA*, encoding a phosphomannomutase which form  
600 an operon with *cg0853* and *rmIA2* encoding a mannose-1-phosphate guanylyl transferase). As  
601 this nucleoside-diphosphate-sugar is an important provider of mannose for  
602 lipopolysaccharide and protein mannosylation in the cell envelope, disruption of its synthesis  
603 could have negative effects on cell wall integrity. There are no current indications linking the  
604 three remaining proteins (*ort-Cg1270*, *ort-Cg1137* and *ort-Cg0947*) to any process related to  
605 the cell envelope: *Cg1270* is annotated as a putative O-methyltransferase (COG4122), *Cg1137*  
606 as a putative regulator of the LysR family and *Cg0947* a protein with a conserved domain of  
607 unknown function.

608

## 609 **Approximately half of the non-characterized proteins are conserved** 610 **among the *Corynebacteriales***

611 Since *Corynebacteriales* share unique properties in relation to their cell wall, we determined  
612 whether the proteins of unknown function identified in this work are conserved within this  
613 order. We chose 5 species, representative of the main genera that compose this order (*M.*  
614 *tuberculosis*, *Rhodococcus erythropolis*, *Nocardia farcinica*, *Gordonia bronchialis*,  
615 *Tsukamurella paurometabola*) and *M. leprae* because of its highly degenerate genome and  
616 searched for orthologues among these different species using BLASTp. As shown in S3 Table,  
617 7 proteins identified by our screen (*Cg0853*, *Cg0947*, *Cg1270*, *Cg1603*, *Cg2207*, *Cg2424* and  
618 *Cg3165*) have orthologues in all 6 species, with *Cg1603* and *Cg2207* being the best conserved  
619 between them (score > 200). Four proteins possess orthologues in all species except *M. leprae*

620 (Cg1246, Cg2157, Cg2861 and Cg2971) with Cg2157 being the best conserved (score > 200).  
621 Thus, about half of the proteins found in this study is conserved among *Corynebacteriales* and  
622 in particular in *M. tuberculosis*. Of the 12 *M. tuberculosis* orthologous proteins, 5 are essential  
623 according to Sasseti et al. (Rv0883c, Rv1697, Rv2219, Rv0226c, Rv0224c) [77]. Five proteins  
624 appear to be specific to the *Corynebacterium* genera (Cg0575, Cg1254, Cg2397, Cg3052 and  
625 Cg3192) with Cg3052 restricted to *C. glutamicum*.

626

### 627 **Cg1246 is very likely involved in mycolic acid metabolism**

628 To identify transposon insertion in genes that are potentially involved in mycolate  
629 biosynthesis, we performed TLC analysis of organic solvent-extractable lipids from the 30  
630 mutants interrupted in loci encoding proteins of unknown function and searched for those  
631 with altered mycolate profiles (data not shown). Three mutants (4954, 6935 and 7968, S2  
632 Table) clearly showed a significant decrease in TMM (Fig 4A). The 3 mutants were all  
633 interrupted in a single gene, *ort-cg1246*. We thus attempted to delete *cg1246* in the *C.*  
634 *glutamicum* RES167 strain. For that purpose, a non-replicative pK18mobsac-derivative  
635 plasmid was constructed (pK18mobsac $\Delta$ 1246) carrying sequences adjacent to the gene [24].  
636 Kanamycin-sensitive and sucrose-resistant clones resulting from two recombination events  
637 between the plasmid and chromosome were easily obtained. Colonies in which the second  
638 recombination event led to proper deletion of the desired DNA fragment were identified using  
639 PCR with primers designed up- and downstream of this fragment. One mutant, corresponding  
640 to the expected deletion, was chosen for further characterization ( $\Delta$ 1246 strain). As expected  
641 from the results obtained with the *ort-cg1246* interrupted mutants, the TLC profile of the  
642  $\Delta$ 1246 extractable lipids showed a significant decrease in the TMM pool as compared to the

643 WT strain, which was restored by complementation with a plasmid bearing a copy of the wild  
644 type *cg1246* gene (Fig 4B). Quantification of trehalose lipids, performed after radiolabelling  
645 with  $1\text{-}^{14}\text{C}$  palmitate, and TLC analysis of the extractable lipids, confirmed the importance of  
646 the TMM deficiency in the  $\Delta 1246$  strain, which could be estimated as four-fold when  
647 compared to the WT strain in exponentially growing cells (Fig 4C). In contrast, the TDM pool  
648 remained comparable between these two strains under the same growth conditions. Thus,  
649 the  $\Delta 1246$  mutant displayed a TMM/TDM ratio lower than that of the WT cells in exponential  
650 growth (Fig 4D). In stationary phase, due to the very low level of TMM naturally present in the  
651 cell wall, the effects of *cg1246* inactivation were much less visible and led to a TMM/TDM  
652 ratio nearly similar to that of the wild type (data not shown). From these data, we conclude  
653 that Cg1246 has an important impact on the pool of TMM. How Cg1246 is connected to the  
654 mycolate pool could not be deduced from these preliminary data nor from the protein  
655 sequence itself. However, two lines of evidence argue in favor of a direct involvement of  
656 Cg1246 in mycolate biosynthesis. First, as highlighted above, the gene was found to be  
657 upregulated by  $\sigma^D$ , the ECF sigma factor which was shown to regulate MA biosynthesis in *C.*  
658 *glutamicum* [72,73]. Second Cg1246 is well conserved in most of *Corynebacteriales* members  
659 and is mostly associated with bacteria of this order, a specificity that is in accordance with a  
660 metabolic function (mycolate biosynthesis) that is unique to bacteria of this taxon.

661

662 **Fig 4. Lipid analyses of Cg1246 mutants.** (A) and (B): TLC analysis of crude lipid extracts  
663 isolated from exponentially growing *cg1246*-inactivated mutants. Lipids were extracted as  
664 described in Materials and Methods and comparable amounts were loaded on TLC plates. (A):  
665 parental strain *C. glutamicum* 2262 and its isogenic mutant 4954. Glycolipid spots were

666 visualized by spraying 0.2 % anthrone in H<sub>2</sub>SO<sub>4</sub>, followed by charring. (B): parental strain  
667 ATCC13032 and its isogenic mutant strains  $\Delta$ 1246 and  $\Delta$ 1246(pCGL2420). Lipids were  
668 visualized after immersion of the plate in 10% H<sub>2</sub>SO<sub>4</sub> in ethanol, followed by charring. Arrows  
669 indicate the position of trehalose mono- and di-mycolate (TMM and TDM), respectively. (C)  
670 and (D): lipid quantification of RES167 strain (WT) and its derivative  $\Delta$ 1246 and  
671  $\Delta$ 1246(pCGL2420). Exponentially growing cells were labeled with [1-<sup>14</sup>C]palmitate for 1.5 h  
672 and then extracted with organic solvents as described in Materials and Methods and, the  
673 radiolabeled extractable lipids were analyzed by TLC-phosphorImaging. (C): TMM quantities  
674 in arbitrary units (a.u.). (D): TMM/TDM. The relative radioactivity incorporated into TMM and  
675 TDM was determined for each strain, the ratio was calculated and normalized to 1 for the WT  
676 strain (RES167). The values in (C) and (D) are the means  $\pm$  SD of at least three independent  
677 experiments.

678

## 679 **Conclusions**

680 Compared to the large knowledge base acquired concerning cell envelope biogenesis in Gram-  
681 negative bacteria, little is known about the biosynthesis and assembly of the didermic cell  
682 envelope of *Corynebacteriales*. However, since the direct visualization of a mycolate  
683 containing outer membrane [5,6], an ever-increasing number of studies have been published  
684 on the biosynthesis and assembly of the cell envelope of these bacteria. An important part of  
685 the current knowledge on this subject came from the use of *C. glutamicum* because, unlike  
686 mycobacteria, most of the known genes involved in MA and AG biosynthesis are not essential  
687 in this bacterium [3]. It is thus natural that *C. glutamicum* constitutes a model of choice to  
688 search for new genes involved in envelope biosynthesis processes. In this context, we used a

689 classical transposon mutagenesis strategy, combined with an original immunological  
690 screening. We retained 80 mutants out of approximately 10,000 screened colonies, which  
691 corresponded to 55 independent loci. The effectiveness of our screening method was attested  
692 to by the identification of 34 interrupted loci encoding already known functions, more than  
693 half of which is involved in cell envelope biogenesis, *i.e.* biosynthesis of cell envelope  
694 components as well as cell envelope dynamics and assembly including cell division. It is  
695 therefore legitimate to assume that a significant part of the 22 loci of unknown or poorly  
696 characterized function that we identified in this work are also involved in cell envelope  
697 biogenesis. Consistent with this hypothesis is the fact that some of the genes identified in this  
698 study were also found by Lim et al. [13] in their large-scale transposon mutagenesis study  
699 associated with sensitivity to ethambutol (*ste* genes). Indeed, among the 49 *ste* genes, 12 were  
700 also found here (indicated in S2 Table), five of which are uncharacterized genes (cg0575,  
701 cg0853, cg1254, cg2811, cg3165) and two encode poorly characterized proteins linked to cell  
702 division (cg1603 and cg1735). Five additional *ste* mutations were found in predicted operons  
703 that were also inactivated by our transposon and detected by our screen (also indicated in S2  
704 Table).

705 Here we identified *cg1246*, a gene encoding a protein of unknown function well conserved in  
706 *Corynebacteriales* and relatively specific to this order. We characterized the corresponding  
707 mutant and showed the involvement of Cg1246 in MA metabolism. The functional  
708 characterization of this protein is currently underway.

709

## 710 **Acknowledgments**



711 We are very grateful to Pr N. Bayan and Dr M. Daffé for helpful discussions. We want to  
712 acknowledge Pr M. Dubow for critical reading of the manuscript and corrections. We thanks  
713 M. Millot, L. Graffagnino and C. Couteau for all their technical help.

714

## 715 **References**

- 716 1. Goodfellow M, Jones AL. Corynebacteriales ord. nov. Bergey's Manual of Systematics  
717 of Archaea and Bacteria. Chichester, UK: John Wiley & Sons, Ltd; 2015. pp. 1–14.  
718 doi:10.1002/9781118960608.obm00009
- 719 2. Daffé M, Marrakchi H. Unraveling the Structure of the Mycobacterial Envelope. *Microbiol*  
720 *Spectr.* 2019;7. doi:10.1128/microbiolspec.GPP3-0027-2018
- 721 3. Houssin C, de Sousa d'Auria C, Constantinesco F, Dietrich C, Labarre C, Bayan N. Architecture  
722 and Biogenesis of the Cell Envelope of *Corynebacterium glutamicum*. In: Inui M, Toyoda K,  
723 editors. *Corynebacterium glutamicum: Biology and Biotechnology*. Cham: Springer  
724 International Publishing; 2020. pp. 25–60. doi:10.1007/978-3-030-39267-3\_2
- 725 4. Marrakchi H, Lanéelle M-A, Daffé M. Mycolic acids: structures, biosynthesis, and beyond.  
726 *Chem Biol.* 2014;21: 67–85. doi:10.1016/j.chembiol.2013.11.011
- 727 5. Zuber B, Chami M, Houssin C, Dubochet J, Griffiths G, Daffé M. Direct visualization of the  
728 outer membrane of mycobacteria and corynebacteria in their native state. *J Bacteriol.*  
729 2008;190: 5672–80. doi:10.1128/JB.01919-07
- 730 6. Hoffmann C, Leis A, Niederweis M, Plitzko JM, Engelhardt H. Disclosure of the mycobacterial  
731 outer membrane: cryo-electron tomography and vitreous sections reveal the lipid bilayer  
732 structure. *Proc Natl Acad Sci U S A.* 2008;105: 3963–7. doi:10.1073/pnas.0709530105

- 733 7. Jarlier V, Nikaido H. Mycobacterial cell wall: structure and role in natural resistance to  
734 antibiotics. FEMS Microbiol Lett. 1994;123: 11–8. doi:10.1111/j.1574-6968.1994.tb07194.x
- 735 8. Bhat ZS, Rather MA, Maqbool M, Lah HU, Yousuf SK, Ahmad Z. Cell wall: A versatile fountain  
736 of drug targets in Mycobacterium tuberculosis. Biomed Pharmacother. 2017;95: 1520–1534.  
737 doi:10.1016/j.biopha.2017.09.036
- 738 9. Portevin D, De Sousa-D’Auria C, Houssin C, Grimaldi C, Chami M, Daffé M, et al. A polyketide  
739 synthase catalyzes the last condensation step of mycolic acid biosynthesis in mycobacteria  
740 and related organisms. Proc Natl Acad Sci U S A. 2004;101: 314–9.  
741 doi:10.1073/pnas.0305439101
- 742 10. Alderwick LJ, Radmacher E, Seidel M, Gande R, Hitchen PG, Morris HR, et al. Deletion of Cg-  
743 emb in *Corynebacterianeae* leads to a novel truncated cell wall arabinogalactan, whereas  
744 inactivation of Cg-ubiA results in an arabinan-deficient mutant with a cell wall galactan core. J  
745 Biol Chem. 2005;280: 32362–71. doi:10.1074/jbc.M506339200
- 746 11. Vincent AT, Nyongesa S, Morneau I, Reed MB, Tocheva EI, Veyrier FJ. The Mycobacterial Cell  
747 Envelope: A Relict From the Past or the Result of Recent Evolution? Front Microbiol. 2018;9:  
748 2341. doi:10.3389/fmicb.2018.02341
- 749 12. Wang C, Hayes B, Vestling MM, Takayama K. Transposome mutagenesis of an integral  
750 membrane transporter in *Corynebacterium matruchotii*. Biochem Biophys Res Commun.  
751 2006;340: 953–60. doi:10.1016/j.bbrc.2005.12.097
- 752 13. Lim HC, Sher JW, Rodriguez-Rivera FP, Fumeaux C, Bertozzi CR, Bernhardt TG. Identification of  
753 new components of the RipC-FtsEX cell separation pathway of *Corynebacterineae*. PLOS  
754 Genet. 2019;15: e1008284. doi:10.1371/journal.pgen.1008284
- 755 14. Mishra AK, Alderwick LJ, Rittmann D, Wang C, Bhatt A, Jacobs WR, et al. Identification of a  
756 novel alpha(1-->6) mannopyranosyltransferase MptB from *Corynebacterium glutamicum* by

- 757 deletion of a conserved gene, NCgl1505, affords a lipomannan- and lipoarabinomannan-  
758 deficient mutant. *Mol Microbiol.* 2008;68: 1595–613. doi:10.1111/j.1365-2958.2008.06265.x
- 759 15. Puech V, Bayan N, Salim K, Leblon G, Daffé M. Characterization of the in vivo acceptors of the  
760 mycoloyl residues transferred by the corynebacterial PS1 and the related mycobacterial  
761 antigens 85. *Mol Microbiol.* 2000;35: 1026–41. doi:10.1046/j.1365-2958.2000.01738.x
- 762 16. De Sousa-D’Auria C, Kacem R, Puech V, Tropis M, Leblon G, Houssin C, et al. New insights into  
763 the biogenesis of the cell envelope of corynebacteria: identification and functional  
764 characterization of five new mycoloyltransferase genes in *Corynebacterium glutamicum*.  
765 *FEMS Microbiol Lett.* 2003;224: 35–44. doi:10.1016/S0378-1097(03)00396-3
- 766 17. Bonamy C, Guyonvarch A, Reyes O, David F, Leblon G. Interspecies electro-transformation in  
767 *Corynebacteria*. *FEMS Microbiol Lett.* 1990;54: 263–9. doi:10.1016/0378-1097(90)90294-z
- 768 18. Soual-Hoebeke E, De Sousa-D’Auria C, Chami M, Baucher MF, Guyonvarch A, Bayan N, et al. S-  
769 layer protein production by *Corynebacterium* strains is dependent on the carbon source.  
770 *Microbiology.* 1999;145: 3399–3408. doi:10.1099/00221287-145-12-3399
- 771 19. Dusch N, Pühler A, Kalinowski J. Expression of the *Corynebacterium glutamicum* panD gene  
772 encoding L-aspartate-alpha-decarboxylase leads to pantothenate overproduction in  
773 *Escherichia coli*. *Appl Environ Microbiol.* 1999;65: 1530–9. doi:10.1128/AEM.65.4.1530-  
774 1539.1999
- 775 20. Bonnassie S, Oreglia J, Trautwetter A, Sicard AM. Isolation and characterization of a restriction  
776 and modification deficient mutant of *Brevibacterium lactofermentum*. *FEMS Microbiol Lett.*  
777 1990;60: 143–6. doi:10.1016/0378-1097(90)90361-s
- 778 21. Kacem R, De Sousa-D’Auria C, Tropis M, Chami M, Gounon P, Leblon G, et al. Importance of  
779 mycoloyltransferases on the physiology of *Corynebacterium glutamicum*. *Microbiology.*  
780 2004;150: 73–84. doi:10.1099/mic.0.26583-0

- 781 22. Portevin D, de Sousa-D’Auria C, Montrozier H, Houssin C, Stella A, Lanéelle M-A, et al. The  
782 acyl-AMP ligase FadD32 and AccD4-containing acyl-CoA carboxylase are required for the  
783 synthesis of mycolic acids and essential for mycobacterial growth: identification of the  
784 carboxylation product and determination of the acyl-CoA carboxylase componen. *J Biol Chem.*  
785 2005;280: 8862–74. doi:10.1074/jbc.M408578200
- 786 23. Bonamy C, Labarre J, Cazaubon L, Jacob C, Le Bohec F, Reyes O, et al. The mobile element  
787 IS1207 of *Brevibacterium lactofermentum* ATCC21086: isolation and use in the construction  
788 of Tn5531, a versatile transposon for insertional mutagenesis of *Corynebacterium*  
789 *glutamicum*. *J Biotechnol.* 2003;104: 301–9. doi:10.1016/s0168-1656(03)00150-0
- 790 24. Schäfer A, Tauch A, Jäger W, Kalinowski J, Thierbach G, Pühler A. Small mobilizable multi-  
791 purpose cloning vectors derived from the *Escherichia coli* plasmids pK18 and pK19: selection  
792 of defined deletions in the chromosome of *Corynebacterium glutamicum*. *Gene.* 1994;145:  
793 69–73. doi:10.1016/0378-1119(94)90324-7
- 794 25. Peyret JL, Bayan N, Joliff G, Gulik-Krzywicki T, Mathieu L, Schechter E, et al. Characterization of  
795 the *cspB* gene encoding PS2, an ordered surface-layer protein in *Corynebacterium*  
796 *glutamicum*. *Mol Microbiol.* 1993;9: 97–109. doi:10.1111/j.1365-2958.1993.tb01672.x
- 797 26. Ausubel F, Brent R, Kingston R, Moore D, Seidman J, Smith J, et al. *Current protocols in*  
798 *molecular biology*. New York: Wiley Interscience; 1987.
- 799 27. Daffe M, Brennan PJ, McNeil M. Predominant structural features of the cell wall  
800 arabinogalactan of *Mycobacterium tuberculosis* as revealed through characterization of  
801 oligoglycosyl alditol fragments by gas chromatography/mass spectrometry and by <sup>1</sup>H and <sup>13</sup>C  
802 NMR analyses. *J Biol Chem.* 1990;265: 6734–43.
- 803 28. Green MR, Sambrook J. Inverse Polymerase Chain Reaction (PCR). *Cold Spring Harb Protoc.*  
804 2019;2019: pdb.prot095166. doi:10.1101/pdb.prot095166

- 805 29. Das S, Noe JC, Paik S, Kitten T. An improved arbitrary primed PCR method for rapid  
806 characterization of transposon insertion sites. *J Microbiol Methods*. 2005;63: 89–94.  
807 doi:10.1016/j.mimet.2005.02.011
- 808 30. Marchler-Bauer A, Bo Y, Han L, He J, Lanczycki CJ, Lu S, et al. CDD/SPARCLE: functional  
809 classification of proteins via subfamily domain architectures. *Nucleic Acids Res*. 2017;45:  
810 D200–D203. doi:10.1093/nar/gkw1129
- 811 31. Chen I-MA, Chu K, Palaniappan K, Pillay M, Ratner A, Huang J, et al. IMG/M v.5.0: an  
812 integrated data management and comparative analysis system for microbial genomes and  
813 microbiomes. *Nucleic Acids Res*. 2019;47: D666–D677. doi:10.1093/nar/gky901
- 814 32. Huerta-Cepas J, Szklarczyk D, Heller D, Hernández-Plaza A, Forslund SK, Cook H, et al. eggNOG  
815 5.0: a hierarchical, functionally and phylogenetically annotated orthology resource based on  
816 5090 organisms and 2502 viruses. *Nucleic Acids Res*. 2019;47: D309–D314.  
817 doi:10.1093/nar/gky1085
- 818 33. Pfeifer-Sancar K, Mentz A, Rückert C, Kalinowski J. Comprehensive analysis of the  
819 *Corynebacterium glutamicum* transcriptome using an improved RNAseq technique. *BMC*  
820 *Genomics*. 2013;14: 888. doi:10.1186/1471-2164-14-888
- 821 34. Bou Raad R, Méniche X, de Sousa-d’Auria C, Chami M, Salmeron C, Tropis M, et al. A  
822 deficiency in arabinogalactan biosynthesis affects *Corynebacterium glutamicum* mycolate  
823 outer membrane stability. *J Bacteriol*. 2010;192: 2691–700. doi:10.1128/JB.00009-10
- 824 35. Meniche X, de Sousa-d’Auria C, Van-der-Rest B, Bhamidi S, Huc E, Huang H, et al. Partial  
825 redundancy in the synthesis of the D-arabinose incorporated in the cell wall arabinan of  
826 *Corynebacterineae*. *Microbiology*. 2008;154: 2315–26. doi:10.1099/mic.0.2008/016378-0
- 827 36. Kalinowski J, Bathe B, Bartels D, Bischoff N, Bott M, Burkovski A, et al. The complete  
828 *Corynebacterium glutamicum* ATCC 13032 genome sequence and its impact on the

- 829 production of l-aspartate-derived amino acids and vitamins. J Biotechnol. 2003;104: 5–25.  
830 doi:10.1016/S0168-1656(03)00154-8
- 831 37. Tropis M, Meniche X, Wolf A, Gebhardt H, Strelkov S, Chami M, et al. The crucial role of  
832 trehalose and structurally related oligosaccharides in the biosynthesis and transfer of mycolic  
833 acids in *Corynebacterineae*. J Biol Chem. 2005;280: 26573–85. doi:10.1074/jbc.M502104200
- 834 38. Wehrmann A, Phillipp B, Sahm H, Eggeling L. Different Modes of Diaminopimelate Synthesis  
835 and Their Role in Cell Wall Integrity: a Study with *Corynebacterium glutamicum*. J Bacteriol.  
836 1998;180: 3159–3165. doi:10.1128/JB.180.12.3159-3165.1998
- 837 39. Schneider J, Peters-Wendisch P, Stansen KC, Götker S, Maximow S, Krämer R, et al.  
838 Characterization of the biotin uptake system encoded by the biotin-inducible bioYMN operon  
839 of *Corynebacterium glutamicum*. BMC Microbiol. 2012;12: 6. doi:10.1186/1471-2180-12-6
- 840 40. Hashimoto K, Kawasaki H, Akazawa K, Nakamura J, Asakura Y, Kudo T, et al. Changes in  
841 composition and content of mycolic acids in glutamate-overproducing *Corynebacterium*  
842 *glutamicum*. Biosci Biotechnol Biochem. 2006;70: 22–30. doi:10.1271/bbb.70.22
- 843 41. Radmacher E, Alderwick LJ, Besra GS, Brown AK, Gibson KJC, Sahm H, et al. Two functional  
844 FAS-I type fatty acid synthases in *Corynebacterium glutamicum*. Microbiology. 2005;151:  
845 2421–7. doi:10.1099/mic.0.28012-0
- 846 42. Grover S, Alderwick LJ, Mishra AK, Krumbach K, Marienhagen J, Eggeling L, et al.  
847 Benzothiazinones mediate killing of *Corynebacterineae* by blocking decaprenyl phosphate  
848 recycling involved in cell wall biosynthesis. J Biol Chem. 2014;289: 6177–87.  
849 doi:10.1074/jbc.M113.522623
- 850 43. Gande R, Dover LG, Krumbach K, Besra GS, Sahm H, Oikawa T, et al. The two carboxylases of  
851 *Corynebacterium glutamicum* essential for fatty acid and mycolic acid synthesis. J Bacteriol.  
852 2007;189: 5257–64. doi:10.1128/JB.00254-07

- 853 44. Chalut C, Botella L, de Sousa-D'Auria C, Houssin C, Guilhot C. The nonredundant roles of two  
854 4'-phosphopantetheinyl transferases in vital processes of Mycobacteria. Proc Natl Acad Sci U S  
855 A. 2006;103: 8511–6. doi:10.1073/pnas.0511129103
- 856 45. Rainczuk AK, Klatt S, Yamaryo-Botté Y, Brammananth R, McConville XMJ, Coppel RL, et al.  
857 Mtrp, a putative methyltransferase in corynebacteria, is required for optimal membrane  
858 transport of trehalose mycolates. J Biol Chem. 2020;295: 6108–6119.  
859 doi:10.1074/jbc.RA119.011688
- 860 46. Lea-Smith DJ, Pyke JS, Tull D, McConville MJ, Coppel RL, Crellin PK. The reductase that  
861 catalyzes mycolic motif synthesis is required for efficient attachment of mycolic acids to  
862 arabinogalactan. J Biol Chem. 2007;282: 11000–8. doi:10.1074/jbc.M608686200
- 863 47. Alderwick LJ, Birch HL, Krumbach K, Bott M, Eggeling L, Besra GS. AftD functions as an  $\alpha 1 \rightarrow 5$   
864 arabinofuranosyltransferase involved in the biosynthesis of the mycobacterial cell wall core.  
865 Cell Surf (Amsterdam, Netherlands). 2018;1: 2–14. doi:10.1016/j.tcsw.2017.10.001
- 866 48. Seidel M, Alderwick LJ, Birch HL, Sahm H, Eggeling L, Besra GS. Identification of a novel  
867 arabinofuranosyltransferase AftB involved in a terminal step of cell wall arabinan biosynthesis  
868 in *Corynebacteriaceae*, such as *Corynebacterium glutamicum* and *Mycobacterium*  
869 *tuberculosis*. J Biol Chem. 2007;282: 14729–40. doi:10.1074/jbc.M700271200
- 870 49. Kremer L, Dover LG, Morehouse C, Hitchin P, Everett M, Morris HR, et al. Galactan  
871 biosynthesis in *Mycobacterium tuberculosis*. Identification of a bifunctional UDP-  
872 galactofuranosyltransferase. J Biol Chem. 2001;276: 26430–40. doi:10.1074/jbc.M102022200
- 873 50. Donovan C, Bramkamp M. Cell division in Corynebacterineae. Front Microbiol. 2014;5: 132.  
874 doi:10.3389/fmicb.2014.00132
- 875 51. Valbuena N, Letek M, Ordóñez E, Ayala J, Daniel RA, Gil JA, et al. Characterization of HMW-  
876 PBPs from the rod-shaped actinomycete *Corynebacterium glutamicum*: peptidoglycan

- 877 synthesis in cells lacking actin-like cytoskeletal structures. *Mol Microbiol.* 2007;66: 643–57.  
878 doi:10.1111/j.1365-2958.2004.05943.x
- 879 52. Oikawa T, Tauch A, Schaffer S, Fujioka T. Expression of *alr* gene from *Corynebacterium*  
880 *glutamicum* ATCC 13032 in *Escherichia coli* and molecular characterization of the recombinant  
881 alanine racemase. *J Biotechnol.* 2006;125: 503–512. doi:10.1016/j.jbiotec.2006.04.002
- 882 53. Levefaudes M, Patin D, de Sousa-d’Auria C, Chami M, Blanot D, Hervé M, et al. Diaminopimelic  
883 Acid Amidation in *Corynebacteriales*: NEW INSIGHTS INTO THE ROLE OF *LtsA* IN  
884 PEPTIDOGLYCAN MODIFICATION. *J Biol Chem.* 2015;290: 13079–94.  
885 doi:10.1074/jbc.M115.642843
- 886 54. Valbuena N, Letek M, Ramos A, Ayala J, Nakunst D, Kalinowski J, et al. Morphological changes  
887 and proteome response of *Corynebacterium glutamicum* to a partial depletion of *FtsI*.  
888 *Microbiology.* 2006;152: 2491–2503. doi:10.1099/mic.0.28773-0
- 889 55. Carrión M, Gómez MJ, Merchante-Schubert R, Dongarrá S, Ayala JA. *mraW*, an essential gene  
890 at the *dcw* cluster of *Escherichia coli* codes for a cytoplasmic protein with methyltransferase  
891 activity. *Biochimie.* 1999;81: 879–88. doi:10.1016/s0300-9084(99)00208-4
- 892 56. Huc E, de Sousa-D’Auria C, de la Sierra-Gallay IL, Salmeron C, van Tilbeurgh H, Bayan N, et al.  
893 Identification of a mycoloyl transferase selectively involved in o-acylation of polypeptides in  
894 *Corynebacteriales*. *J Bacteriol.* 2013;195: 4121–8. doi:10.1128/JB.00285-13
- 895 57. Dautin N, Argentini M, Mohiman N, Labarre C, Cornu D, Sago L, et al. Role of the unique, non-  
896 essential phosphatidylglycerol::prolipoprotein diacylglyceryl transferase (*Lgt*) in  
897 *Corynebacterium glutamicum*. *Microbiology.* 2020;166: 759–776. doi:10.1099/mic.0.000937
- 898 58. Schwinde JW, Hertz PF, Sahn H, Eikmanns BJ, Guyonvarch A. Lipoamide dehydrogenase from  
899 *Corynebacterium glutamicum*: molecular and physiological analysis of the *lpd* gene and  
900 characterization of the enzyme. *Microbiology.* 2001;147: 2223–31. doi:10.1099/00221287-



- 901 147-8-2223
- 902 59. Caspi R, Billington R, Fulcher CA, Keseler IM, Kothari A, Krummenacker M, et al. The MetaCyc  
903 database of metabolic pathways and enzymes. *Nucleic Acids Res.* 2018;46: D633–D639.  
904 doi:10.1093/nar/gkx935
- 905 60. Ankri S, Serebrijski I, Reyes O, Leblon G. Mutations in the *Corynebacterium glutamicum*  
906 proline biosynthetic pathway: A natural bypass of the proA step. *J Bacteriol.* 1996;178: 4412–  
907 4419. doi:10.1128/jb.178.15.4412-4419.1996
- 908 61. Davoudi C-F, Ramp P, Baumgart M, Bott M. Identification of Surf1 as an assembly factor of the  
909 cytochrome bc1-aa3 supercomplex of Actinobacteria. *Biochim Biophys acta Bioenerg.* 2019.  
910 doi:10.1016/j.bbabi.2019.06.005
- 911 62. Morosov X, Davoudi C-F, Baumgart M, Brocker M, Bott M. The copper-deprivation stimulon of  
912 *Corynebacterium glutamicum* comprises proteins for biogenesis of the actinobacterial  
913 cytochrome bc1-aa3 supercomplex. *J Biol Chem.* 2018;293: 15628–15640.  
914 doi:10.1074/jbc.RA118.004117
- 915 63. Bott M, Niebisch A. The respiratory chain of *Corynebacterium glutamicum*. *J Biotechnol.*  
916 2003;104: 129–53. doi:10.1016/S0168-1656(03)00144-5
- 917 64. Jochmann N, Götter S, Tauch A. Positive transcriptional control of the pyridoxal phosphate  
918 biosynthesis genes *pdxST* by the MocR-type regulator PdxR of *Corynebacterium glutamicum*  
919 ATCC 13032. *Microbiology.* 2011;157: 77–88. doi:10.1099/mic.0.044818-0
- 920 65. Si M, Wang J, Xiao X, Guan J, Zhang Y, Ding W, et al. Ohr protects *Corynebacterium*  
921 *glutamicum* against organic hydroperoxide induced oxidative stress. *PLoS One.* 2015;10: 1–17.  
922 doi:10.1371/journal.pone.0131634
- 923 66. Kalyani BS, Kunamneni R, Wal M, Ranjan A, Sen R. A NusG paralogue from *Mycobacterium*  
924 *tuberculosis*, Rv0639, has evolved to interact with ribosomal protein S10 (Rv0700) but not to

- 925 function as a transcription elongation-termination factor. *Microbiology*. 2015;161: 67–83.  
926 doi:10.1099/mic.0.083709-0
- 927 67. Kim HJ, Kim Y, Lee MS, Lee HS. Gene *ImrB* of *Corynebacterium glutamicum* confers efflux-  
928 mediated resistance to lincomycin. *Mol Cells*. 2001;12: 112–6.
- 929 68. Wolschendorf F, Ackart D, Shrestha TB, Hascall-Dove L, Nolan S, Lamichhane G, et al. Copper  
930 resistance is essential for virulence of *Mycobacterium tuberculosis*. *Proc Natl Acad Sci U S A*.  
931 2011;108: 1621–6. doi:10.1073/pnas.1009261108
- 932 69. Schneider JS, Sklar JG, Glickman MS. The Rip1 protease of *mycobacterium tuberculosis*  
933 controls the SigD regulon. *J Bacteriol*. 2014;196: 2638–2645. doi:10.1128/JB.01537-14
- 934 70. Sklar JG, Makinoshima H, Schneider JS, Glickman MS. M. tuberculosis intramembrane  
935 protease Rip1 controls transcription through three anti-sigma factor substrates. *Mol*  
936 *Microbiol*. 2010;77: 605–17. doi:10.1111/j.1365-2958.2010.07232.x
- 937 71. Makinoshima H, Glickman MS. Regulation of *Mycobacterium tuberculosis* cell envelope  
938 composition and virulence by intramembrane proteolysis. *Nature*. 2005;436: 406–9.  
939 doi:10.1038/nature03713
- 940 72. Toyoda K, Inui M. Extracytoplasmic function sigma factor  $\sigma$ D confers resistance to  
941 environmental stress by enhancing mycolate synthesis and modifying peptidoglycan  
942 structures in *Corynebacterium glutamicum*. *Mol Microbiol*. 2018;107: 312–329.  
943 doi:10.1111/mmi.13883
- 944 73. Taniguchi H, Busche T, Patschkowski T, Niehaus K, Pátek M, Kalinowski J, et al. Physiological  
945 roles of sigma factor SigD in *Corynebacterium glutamicum*. *BMC Microbiol*. 2017;17: 158.  
946 doi:10.1186/s12866-017-1067-6
- 947 74. Raman S, Hazra R, Dascher CC, Husson RN. Transcription Regulation by the *Mycobacterium*  
948 *tuberculosis* Alternative Sigma Factor SigD and Its Role in Virulence Transcription Regulation

- 949 by the Mycobacterium tuberculosis Alternative Sigma Factor SigD and Its Role in Virulence †. J  
950 Bacteriol. 2004;186: 66505–6616. doi:10.1128/JB.186.19.6605
- 951 75. Anantharaman V, Aravind L. Evolutionary history, structural features and biochemical  
952 diversity of the NlpC/P60 superfamily of enzymes. Genome Biol. 2003;4: R11. doi:10.1186/gb-  
953 2003-4-2-r11
- 954 76. Tsuge Y, Ogino H, Teramoto H, Inui M, Yukawa H. Deletion of cgR\_1596 and cgR\_2070,  
955 encoding NlpC/P60 proteins, causes a defect in cell separation in *Corynebacterium*  
956 *glutamicum* R. J Bacteriol. 2008;190: 8204–14. doi:10.1128/JB.00752-08
- 957 77. Sasseti CM, Boyd DH, Rubin EJ. Genes required for mycobacterial growth defined by high  
958 density mutagenesis. Mol Microbiol. 2003;48: 77–84. doi:10.1046/j.1365-2958.2003.03425.x

959

## 960 **Supporting information**

961 **S1 Fig. Examples of membranes obtained after immunological screening.** (A): Example of a  
962 membrane obtained after a first round of immunological screening. Ninety-six colonies  
963 corresponding to 96 different mutant strains, were grown on a nitrocellulose membrane  
964 layered on a BHI-plate. The membrane was treated with anti-AG antiserum and revealed as  
965 described in Materials and Methods. The lower line corresponds to control strains: 2 colonies  
966 of the WT strain 2262 and 3 colonies representing positive controls (Cg-Pks<sup>-</sup> and MytA<sup>-</sup>, strains  
967 inactivated in *cg-pks* and *mytA* genes respectively). The white arrows indicate 3 colonies  
968 selected for a second round of screening. (B): Example of a second-round immunological  
969 screening with mutants selected from the first round of immunological screening. On the top:  
970 the nitrocellulose membrane on which colonies have grown, on the bottom: the nitrocellulose  
971 membrane corresponding to the imprint of the agar plate. For more readability, the "imprint"

972 sheet has been flipped to be read in the same direction as the sheet on which mutants grew.  
973 White and black arrows indicate mutants to which a score of 2 or 1 have been assigned,  
974 respectively.

975 **S2 Fig. SDS-PAGE analysis of cell wall and extracellular proteins from the strain *C.***  
976 ***glutamicum* 2262 (WT) and four different mutant strains.** Procedures were performed as  
977 described in Materials and Methods. In this example, the mutants whose numbers are written  
978 in red (strains n° 731, 807 and 3230) have been scored 1 because of a visible alteration of their  
979 cell wall and extracellular protein profiles. The mutant 3137 was scored 0 because of the  
980 similarity of its protein profiles with those of the WT strain. S, supernatant containing the  
981 secreted proteins; CW, cell-wall fraction; MM, molecular mass markers (in kDa).

982 **S1 Table: Primers used in this study**

983 **S2 Table: List of mutant strains and genes interrupted by the transposon.** Transposon  
984 insertion sites and locus tags are given in relation to the genome of the SCgG2 strain  
985 (NC\_021352). Gene in operon are predicted from the transcriptome study of *C. glutamicum*  
986 ATCC13032 published by Pfeifer-sancar et al. [33]. *ste* hits correspond to genes identified by  
987 Lim et al. [13] from a screen based on an increased sensitivity to ethambutol of a library of  
988 mutants. Scores were assigned as described in the text: 1 or 2 for the immunological signal  
989 (see Fig. S1), 1 or 0 for the cell wall and secreted protein profiles (see Fig. S2) and 1 or 0 if the  
990 mutant exhibited at least one phenotypical or growth particularity (see text).

991 TSS: transcription start sites, PO: primary operon, HP: hypothetical protein, HMP: hypothetical  
992 membrane protein, TMS: transmembrane segment, aa: amino acids. ND: not determined

993 **S3 Table: List of *Corynebacteriales* orthologues of the uncharacterized proteins found in this**  
994 **study.** Search for orthologous proteins in *Corynebacteriales* genomes was performed using

995 BLASTp online software at the NCBI. Six different species were chosen for this analysis:  
996 *Mycobacterium tuberculosis* H37Rv (NCBI:txid83332), *Mycobacterium leprae* TN  
997 (NCBI:txid272631), *Rhodococcus erythropolis* SK121 (NCBI:txid596309), *Nocardia farcinica*  
998 IFM 10152 (NCBI:txid247156), *Gordonia bronchialis* DMS 43247 (NCBI:txid526226),  
999 *Tsukamurella paurometabola* DMS 20162 (NCBI:txid521096). The highest alignment score  
1000 (Max score), the percentage of sequence covered by alignment (Query cover), the Expect  
1001 value (E value) and the percent identity between the sequences (Per. ident) are obtained from  
1002 the BLAST result page, given by the online software at <https://blast.ncbi.nlm.nih.gov>.

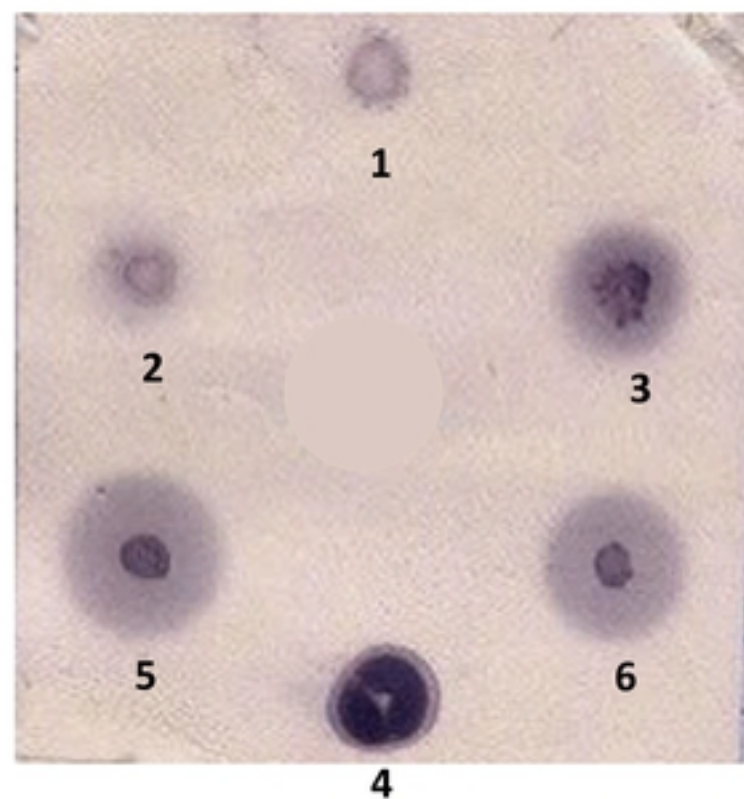

|   | Strains                                                   | % MA |
|---|-----------------------------------------------------------|------|
| 1 | CGL2005                                                   | 100  |
| 2 | CGL2005 ( <i>cmytA</i> -)                                 | 60   |
| 3 | CGL2005 ( $\Delta$ <i>cmytA</i> / $\Delta$ <i>cmytB</i> ) | 40   |
| 4 | ATCC13032 RES167                                          | 100  |
| 5 | ATCC13032 RES167 ( $\Delta$ <i>cg-pks</i> )               | 0    |
| 6 | ATCC13032 RES167 ( $\Delta$ <i>cg-accD3</i> )             | 0    |

Fig 1

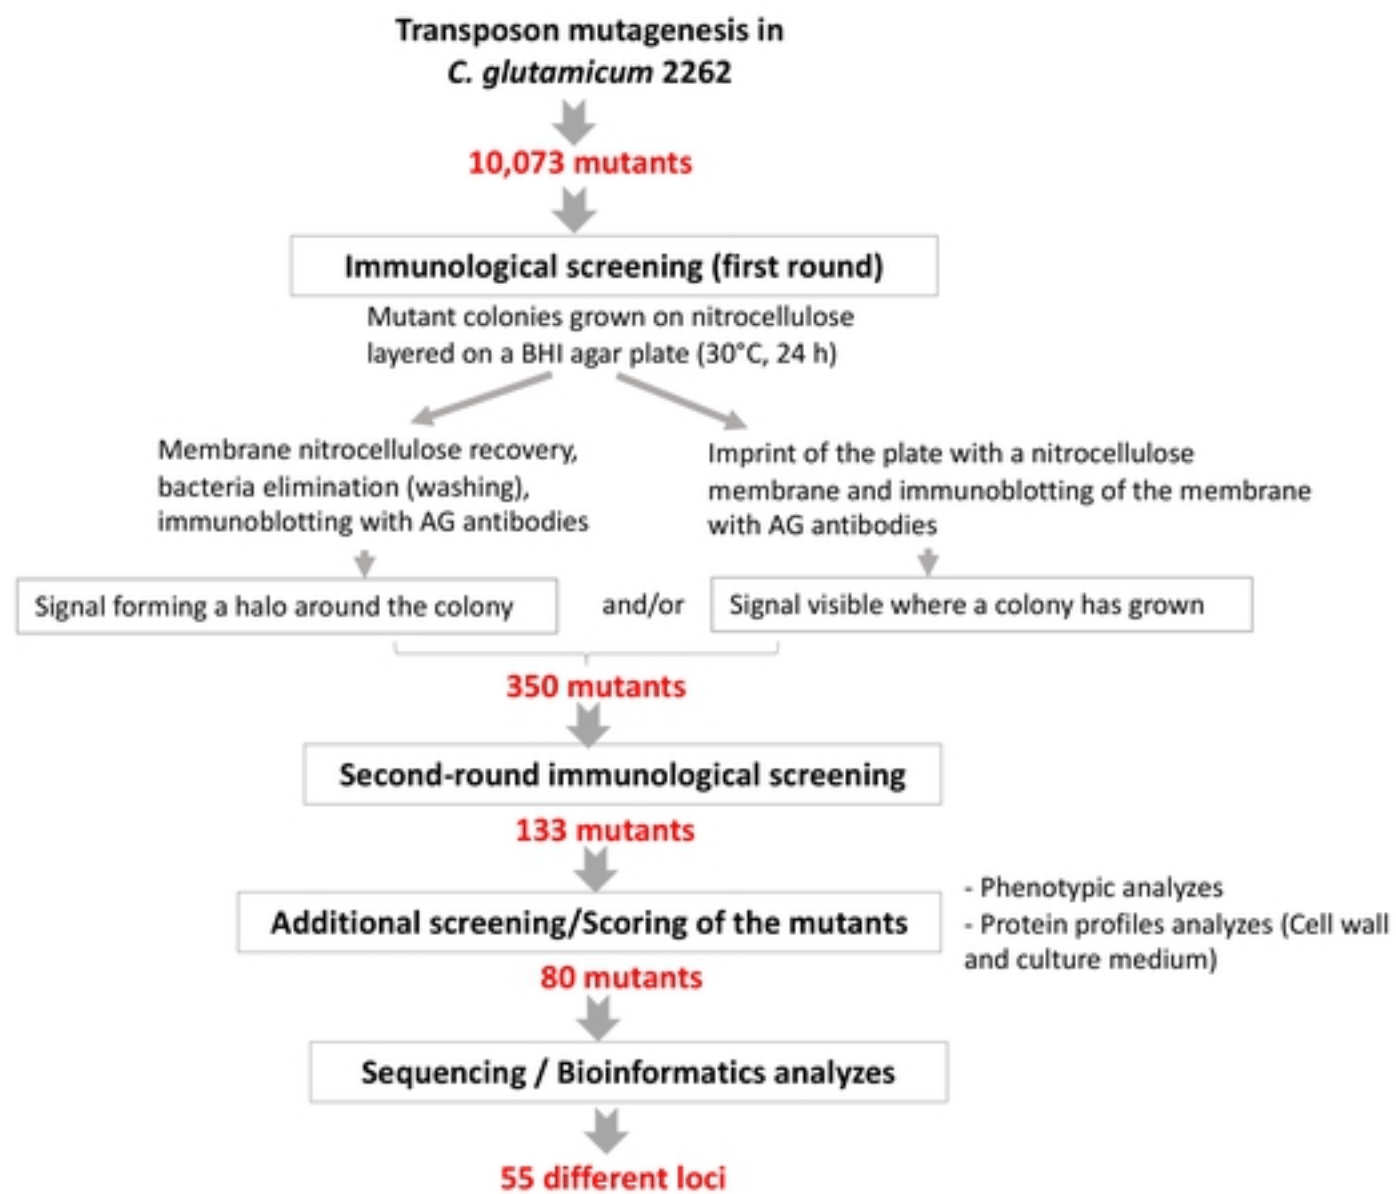

Fig 2

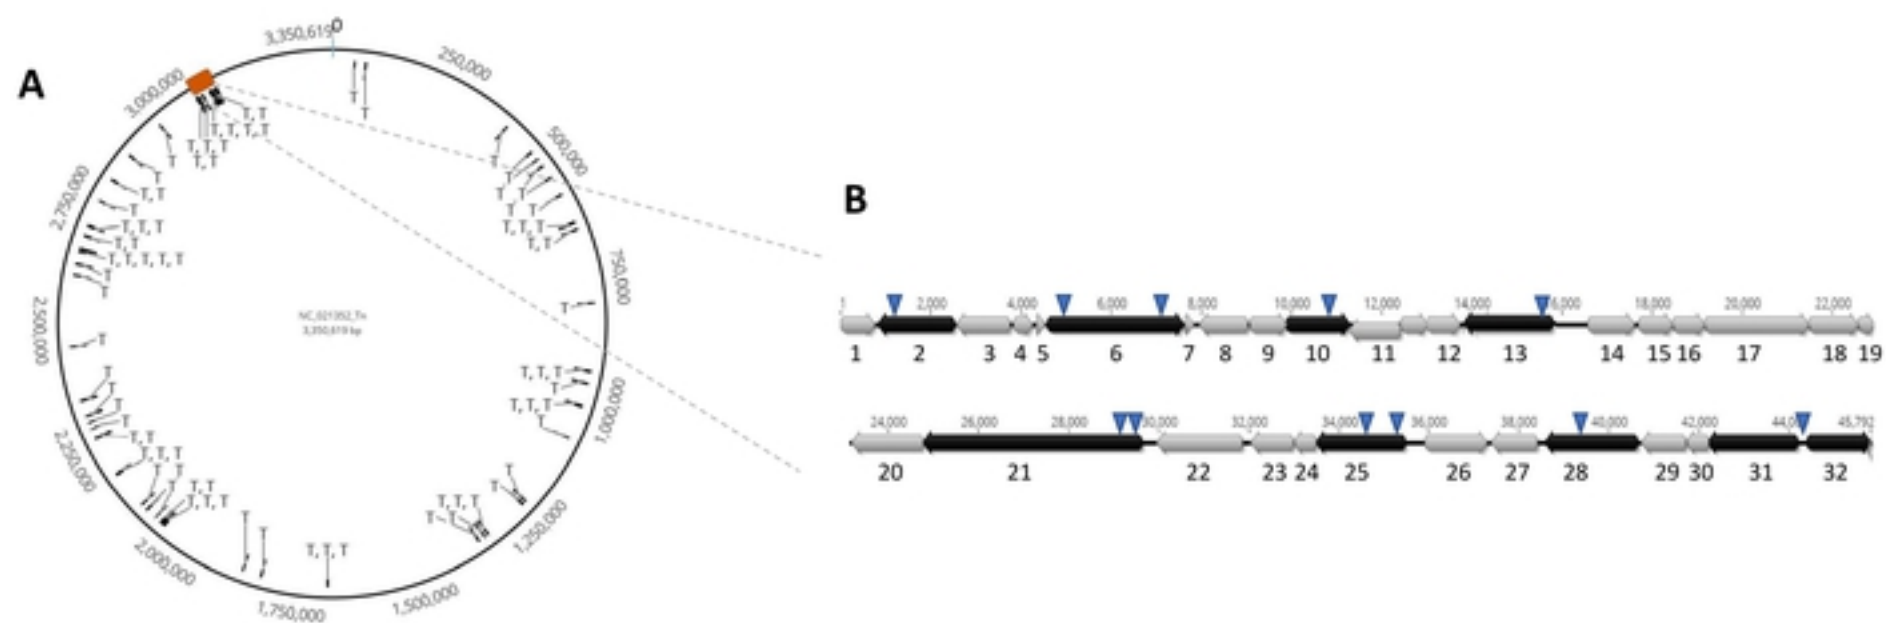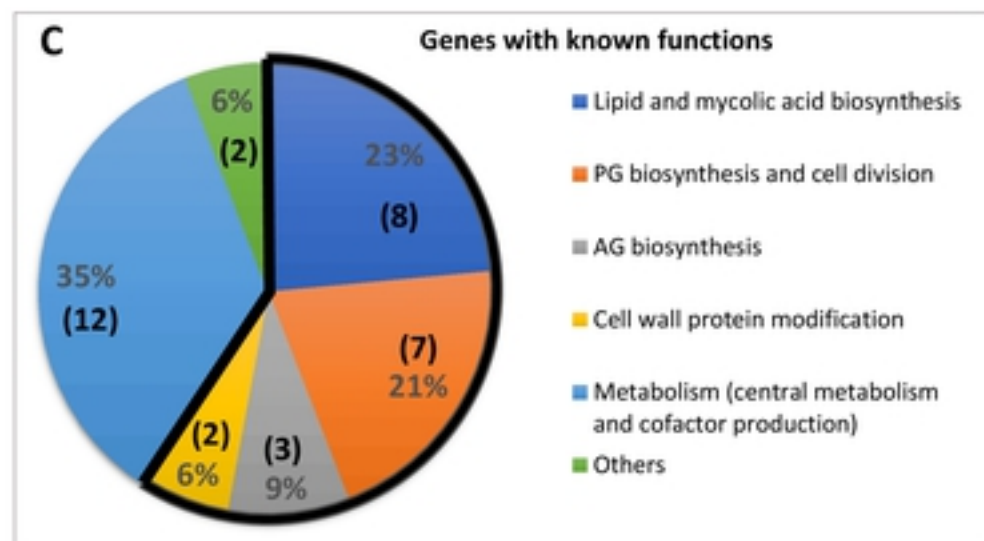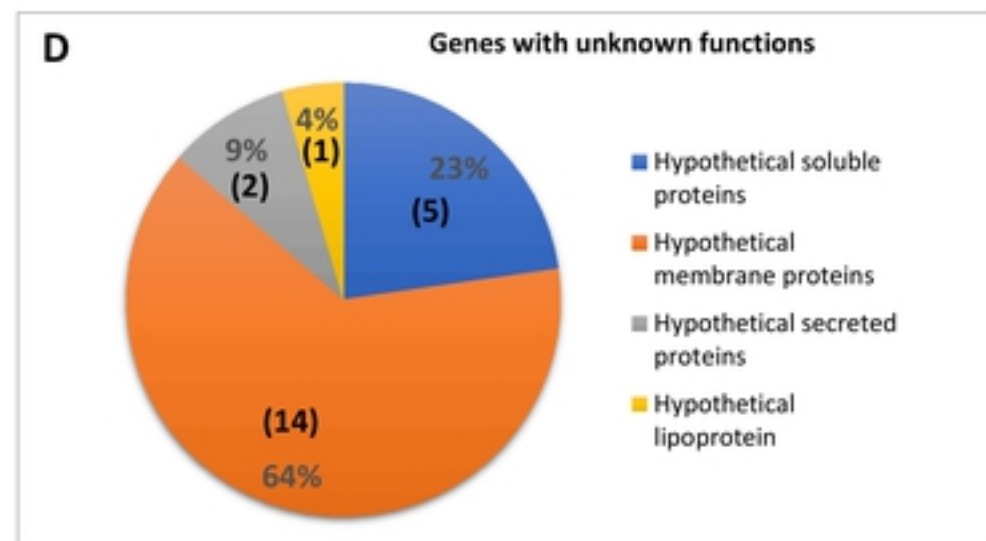

Fig 3



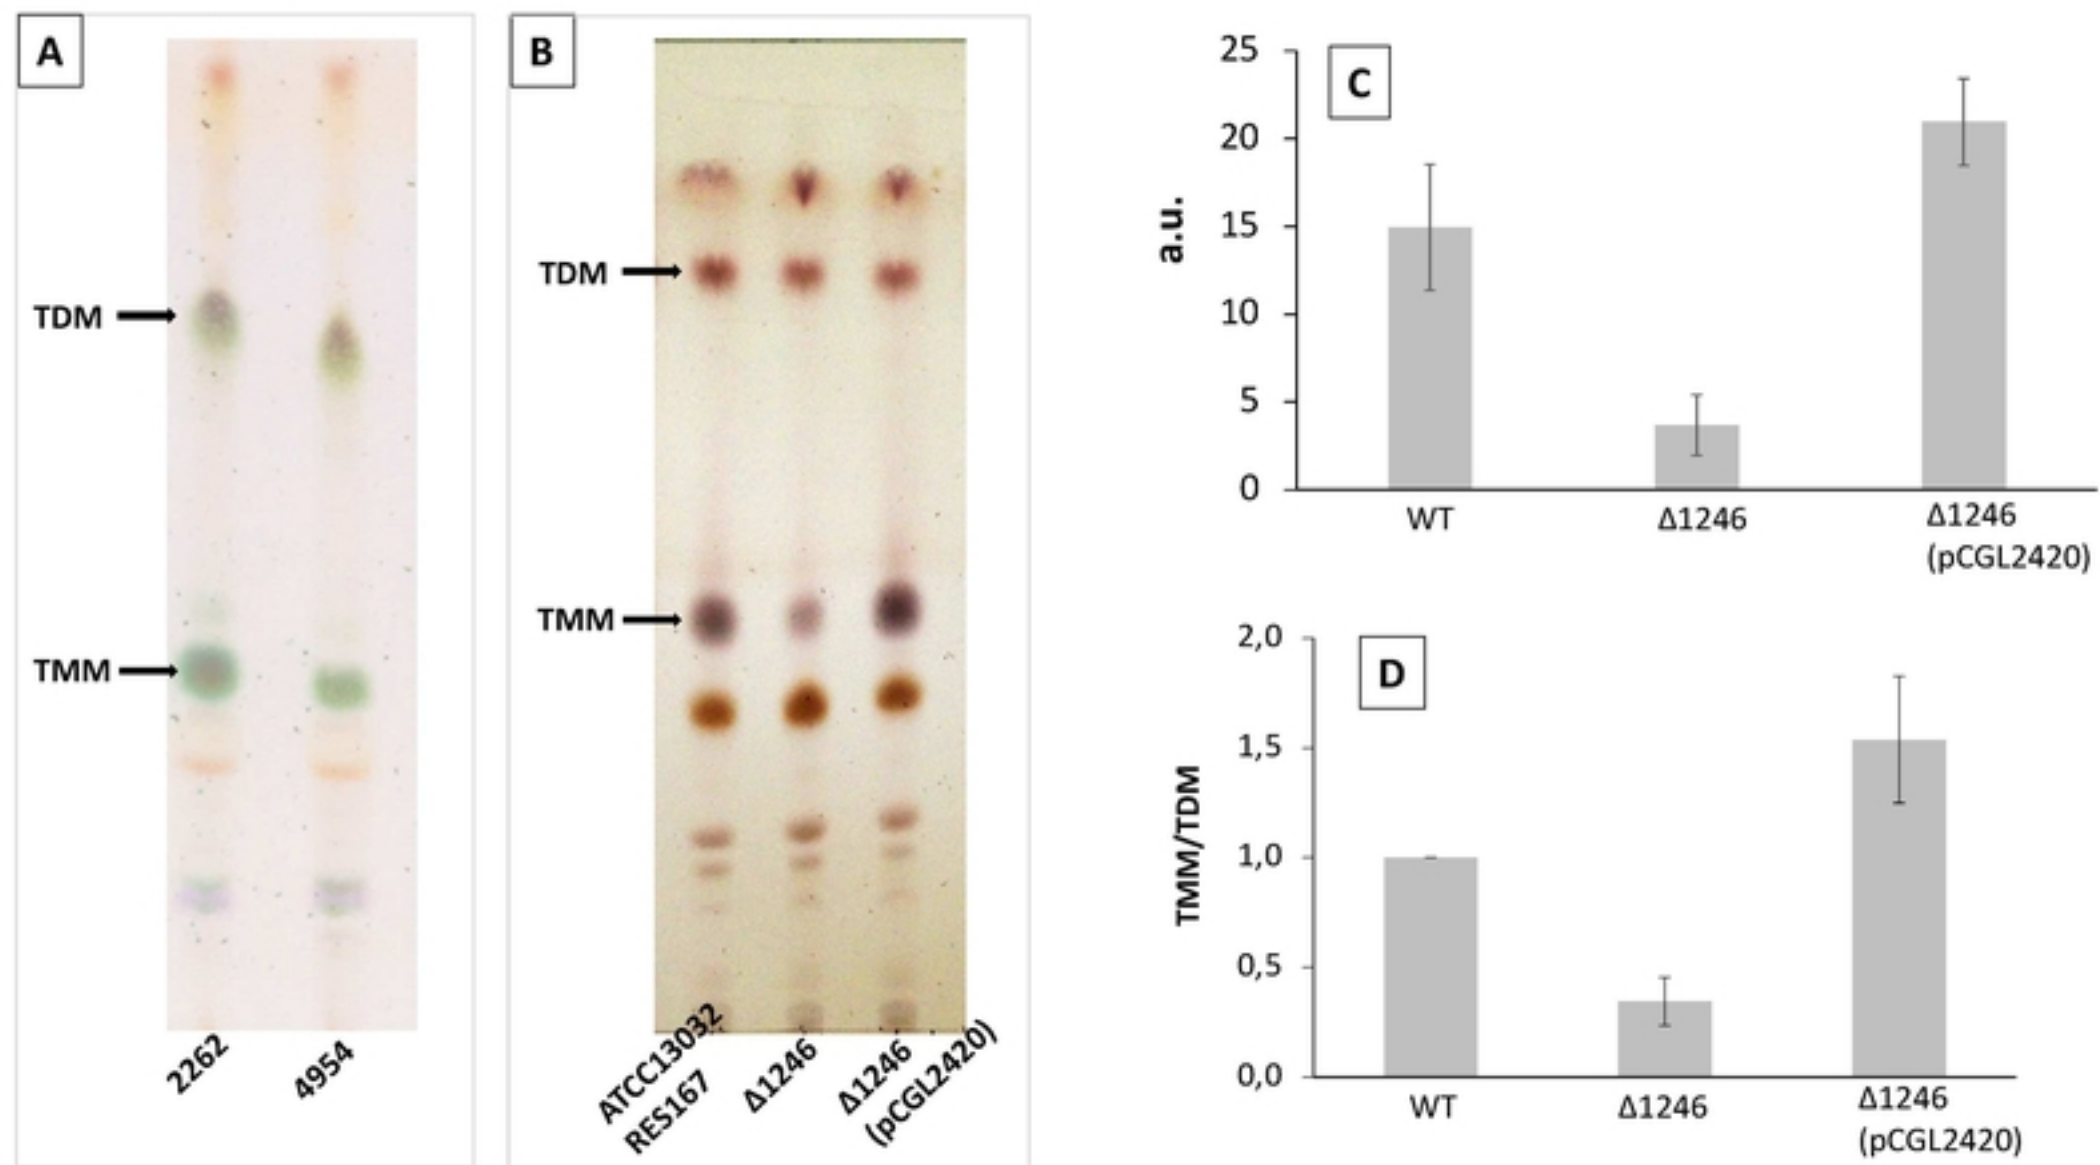

Fig 4
